# Supplementary material for: Adenoviral TMBIM6 vector attenuates ER-stress-induced apoptosis in a neonatal hypoxic-ischemic rat model
Source: PubMed Central journal article supplement (PMC6898997; doi:10.1242/dmm.040352), 2019-11-22
Supplement: dmm-12-040352-s1.pdf [file dmm-12-040352-s1.pdf]

**Table S1 Statistical Analysis for Endogenous Proteins Expression Levels post-HI**

| Statistical Data Analysis for Fig. 1B |                                   |                     |              |          |                  |                             |                             |                   |                   |            |
|---------------------------------------|-----------------------------------|---------------------|--------------|----------|------------------|-----------------------------|-----------------------------|-------------------|-------------------|------------|
| BI-1 Time Course Western Blot         | Tukey's multiple comparisons test | 95% CI of diff.     | Significant? | Summary  | Adjusted P Value | ANOVA table                 | DF                          | F (DFn, DFd)      | P value           |            |
|                                       |                                   |                     |              |          |                  |                             | Treatment (between columns) | 4                 | F (4, 15) = 5.845 | P = 0.0049 |
|                                       | Sham vs. 6h                       | -0.3716 to 0.2680   | No           | ns       | 0.9861           | Residual (within columns)   | 15                          |                   |                   |            |
|                                       | Sham vs. 12h                      | -0.5935 to 0.04614  | No           | ns       | 0.1119           | Total                       | 19                          |                   |                   |            |
|                                       | Sham vs. 24h                      | -0.7165 to -0.07689 | Yes          | *        | 0.0121           |                             |                             |                   |                   |            |
|                                       | Sham vs. 72h                      | -0.3391 to 0.3005   | No           | ns       | 0.9997           |                             |                             |                   |                   |            |
|                                       | 6h vs. 12h                        | -0.5417 to 0.09790  | No           | ns       | 0.2533           |                             |                             |                   |                   |            |
|                                       | 6h vs. 24h                        | -0.6647 to -0.02513 | Yes          | *        | 0.0317           |                             |                             |                   |                   |            |
|                                       | 6h vs. 72h                        | -0.2873 to 0.3523   | No           | ns       | 0.9976           |                             |                             |                   |                   |            |
|                                       | 12h vs. 24h                       | -0.4428 to 0.1968   | No           | ns       | 0.758            |                             |                             |                   |                   |            |
| 12h vs. 72h                           | -0.06540 to 0.5742                | No                  | ns           | 0.1537   |                  |                             |                             |                   |                   |            |
| 24h vs. 72h                           | 0.05763 to 0.6972                 | Yes                 | *            | 0.0173   |                  |                             |                             |                   |                   |            |
| Statistical Data Analysis for Fig. 1C |                                   |                     |              |          |                  |                             |                             |                   |                   |            |
| IRE1 Time Course Western Blot         | Tukey's multiple comparisons test | 95% CI of diff.     | Significant? | Summary  | Adjusted P Value | ANOVA table                 | DF                          | F (DFn, DFd)      | P value           |            |
|                                       |                                   |                     |              |          |                  | Treatment (between columns) | 4                           | F (4, 15) = 19.35 | P < 0.0001        |            |
|                                       | Sham vs. 6h                       | -1.567 to -0.7368   | Yes          | ****     | < 0.0001         | Residual (within columns)   | 15                          |                   |                   |            |
|                                       | Sham vs. 12h                      | -1.214 to -0.3841   | Yes          | ***      | 0.0002           | Total                       | 19                          |                   |                   |            |
|                                       | Sham vs. 24h                      | -1.017 to -0.1876   | Yes          | **       | 0.0034           |                             |                             |                   |                   |            |
|                                       | Sham vs. 72h                      | -1.038 to -0.2081   | Yes          | **       | 0.0025           |                             |                             |                   |                   |            |
|                                       | 6h vs. 12h                        | -0.06208 to 0.7676  | No           | ns       | 0.1152           |                             |                             |                   |                   |            |
|                                       | 6h vs. 24h                        | 0.1344 to 0.9640    | Yes          | **       | 0.0073           |                             |                             |                   |                   |            |
|                                       | 6h vs. 72h                        | 0.1139 to 0.9436    | Yes          | **       | 0.0099           |                             |                             |                   |                   |            |
|                                       | 12h vs. 24h                       | -0.2184 to 0.6113   | No           | ns       | 0.6              |                             |                             |                   |                   |            |
| 12h vs. 72h                           | -0.2388 to 0.5908                 | No                  | ns           | 0.6894   |                  |                             |                             |                   |                   |            |
| 24h vs. 72h                           | -0.4353 to 0.3944                 | No                  | ns           | 0.9999   |                  |                             |                             |                   |                   |            |
| Statistical Data Analysis for Fig. 1D |                                   |                     |              |          |                  |                             |                             |                   |                   |            |
| XBP1 Timecourse Western Blot          | Tukey's multiple comparisons test | 95% CI of diff.     | Significant? | Summary  | Adjusted P Value | ANOVA table                 | DF                          | F (DFn, DFd)      | P value           |            |
|                                       |                                   |                     |              |          |                  | Treatment (between columns) | 4                           | F (4, 15) = 8.499 | P = 0.0009        |            |
|                                       | Sham vs. 6h                       | -2.098 to -0.3184   | Yes          | **       | 0.006            | Residual (within columns)   | 15                          |                   |                   |            |
|                                       | Sham vs. 12h                      | -2.232 to -0.4526   | Yes          | **       | 0.0024           | Total                       | 19                          |                   |                   |            |
|                                       | Sham vs. 24h                      | -2.288 to -0.5089   | Yes          | **       | 0.0017           |                             |                             |                   |                   |            |
|                                       | Sham vs. 72h                      | -2.217 to -0.4374   | Yes          | **       | 0.0027           |                             |                             |                   |                   |            |
|                                       | 6h vs. 12h                        | -1.024 to 0.7556    | No           | ns       | 0.9894           |                             |                             |                   |                   |            |
|                                       | 6h vs. 24h                        | -1.080 to 0.6993    | No           | ns       | 0.9618           |                             |                             |                   |                   |            |
|                                       | 6h vs. 72h                        | -1.009 to 0.7708    | No           | ns       | 0.9932           |                             |                             |                   |                   |            |
|                                       | 12h vs. 24h                       | -0.9461 to 0.8334   | No           | ns       | 0.9996           |                             |                             |                   |                   |            |
| 12h vs. 72h                           | -0.8746 to 0.9049                 | No                  | ns           | > 0.9999 |                  |                             |                             |                   |                   |            |
| 24h vs. 72h                           | -0.8183 to 0.9612                 | No                  | ns           | 0.9991   |                  |                             |                             |                   |                   |            |
| Statistical Data Analysis for Fig. 1E |                                   |                     |              |          |                  |                             |                             |                   |                   |            |
| CHOP Time Course Western Blot         | Tukey's multiple comparisons test | 95% CI of diff.     | Significant? | Summary  | Adjusted P Value | ANOVA table                 | DF                          | F (DFn, DFd)      | P value           |            |
|                                       |                                   |                     |              |          |                  | Treatment (between columns) | 4                           | F (4, 15) = 3.182 | P = 0.0443        |            |
|                                       | Sham vs. 6h                       | -1.692 to 0.5472    | No           | ns       | 0.5318           | Residual (within columns)   | 15                          |                   |                   |            |
|                                       | Sham vs. 12h                      | -1.483 to 0.7562    | No           | ns       | 0.8504           | Total                       | 19                          |                   |                   |            |
|                                       | Sham vs. 24h                      | -2.321 to -0.08202  | Yes          | *        | 0.0327           |                             |                             |                   |                   |            |
|                                       | Sham vs. 72h                      | -1.960 to 0.2790    | No           | ns       | 0.1926           |                             |                             |                   |                   |            |
|                                       | 6h vs. 12h                        | -0.9105 to 1.329    | No           | ns       | 0.9766           |                             |                             |                   |                   |            |
|                                       | 6h vs. 24h                        | -1.749 to 0.4903    | No           | ns       | 0.4432           |                             |                             |                   |                   |            |
|                                       | 6h vs. 72h                        | -1.388 to 0.8513    | No           | ns       | 0.9435           |                             |                             |                   |                   |            |
|                                       | 12h vs. 24h                       | -1.958 to 0.2813    | No           | ns       | 0.1946           |                             |                             |                   |                   |            |
| 12h vs. 72h                           | -1.597 to 0.6423                  | No                  | ns           | 0.6858   |                  |                             |                             |                   |                   |            |
| 24h vs. 72h                           | -0.7585 to 1.481                  | No                  | ns           | 0.8532   |                  |                             |                             |                   |                   |            |

A summary excel spreadsheet showing detailed statistical analysis tests with exact p values, degrees of freedom and F values for endogenous expression levels of BI-1, pIRE1α, XBP1 and CHOP. Data expressed as mean +/- SD; Test used was one-way ANOVA followed by Tukey multiple-comparison post hoc analysis (n=4)

**Table S2 Statistical Analysis for Optimal Time of Ad-TMBIM6 Injection at 72h post-HI**

| Statistical Data Analysis for Fig. 2A |                                     |                 |                                     |                  |                                     |                  |                                     |                 |
|---------------------------------------|-------------------------------------|-----------------|-------------------------------------|------------------|-------------------------------------|------------------|-------------------------------------|-----------------|
| Best Time of Vector Delivery          | Vehicle vs Ad-TMBIM6 (72h pre HI)   |                 | Vehicle vs Ad-TMBIM6 (48h pre HI)   |                  | Vehicle vs Ad-TMBIM6 (24h pre HI)   |                  | Vehicle vs Ad-TMBIM6 (1h post HI)   |                 |
|                                       | <b>Unpaired t test</b>              |                 | <b>Unpaired t test</b>              |                  | <b>Unpaired t test</b>              |                  | <b>Unpaired t test</b>              |                 |
|                                       | P value                             | 0.1371          | P value                             | 0.0024           | P value                             | 0.0789           | P value                             | 0.5876          |
|                                       | P value summary                     | ns              | P value summary                     | **               | P value summary                     | ns               | P value summary                     | ns              |
|                                       | Significantly different? (P < 0.05) | No              | Significantly different? (P < 0.05) | Yes              | Significantly different? (P < 0.05) | No               | Significantly different? (P < 0.05) | No              |
|                                       | One- or two-tailed P value?         | Two-tailed      | One- or two-tailed P value?         | Two-tailed       | One- or two-tailed P value?         | Two-tailed       | One- or two-tailed P value?         | Two-tailed      |
|                                       | t, df                               | t=1.715 df=6    | t, df                               | t=4.173 df=9     | t, df                               | t=1.981 df=9     | t, df                               | t=0.5623 df=9   |
|                                       | Difference between means            | -5.640 ± 3.288  | Difference between means            | -9.048 ± 2.168   | Difference between means            | -5.168 ± 2.609   | Difference between means            | -1.920 ± 3.414  |
|                                       | 95% confidence interval             | -13.69 to 2.405 | 95% confidence interval             | -13.95 to -4.144 | 95% confidence interval             | -11.07 to 0.7332 | 95% confidence interval             | -9.642 to 5.803 |

A summary excel spreadsheet showing detailed statistical analysis tests with exact p values, degrees of freedom and F values for percent infarcted area after administration of Ad-TMBIM6 vector to determine optimal time point of injection. Data expressed as mean +/- SD; Test used was Unpaired T-Test (n=6)

**Table S3 Statistical Analysis for Long-term Behavioral Outcomes at 4 weeks post-HI**

| Statistical Data Analysis for Fig. 3A - Foot fault |                                        |                   |                  |                  |                             |                           |                             |              |                   |
|----------------------------------------------------|----------------------------------------|-------------------|------------------|------------------|-----------------------------|---------------------------|-----------------------------|--------------|-------------------|
| Right Foot Fault                                   | Tukey's multiple comparisons test      | 95% CI of diff.   | Significant?     | Summary          | Adjusted P Value            | ANOVA table               | DF                          | F (DFn, DFd) | P value           |
|                                                    |                                        | Sham vs. Vehicle  | -15.61 to -5.227 | Yes              | ***                         | 0.0002                    | Treatment (between columns) | 2            | F (2, 18) = 13.19 |
|                                                    | Sham vs. Ad-TMBIM6                     | -10.66 to 0.03675 | No               | ns               | 0.0518                      | Residual (within columns) | 18                          |              |                   |
|                                                    | Vehicle vs. Ad-TMBIM6                  | 0.1337 to 10.08   | Yes              | *                | 0.0436                      | Total                     | 20                          |              |                   |
| Left Foot Fault                                    | Tukey's multiple comparisons test      | 95% CI of diff.   | Significant?     | Summary          | Adjusted P Value            | ANOVA table               | DF                          | F (DFn, DFd) | P value           |
|                                                    |                                        | Sham vs. Vehicle  | -6.899 to 1.788  | No               | ns                          | 0.3156                    | Treatment (between columns) | 2            | F (2, 19) = 1.327 |
|                                                    | Sham vs. Ad-TMBIM6                     | -5.156 to 4.013   | No               | ns               | 0.9464                      | Residual (within columns) | 19                          |              |                   |
|                                                    | Vehicle vs. Ad-TMBIM6                  | -2.169 to 6.137   | No               | ns               | 0.4598                      | Total                     | 21                          |              |                   |
| Statistical Data Analysis for Fig. 3B - Water Maze |                                        |                   |                  |                  |                             |                           |                             |              |                   |
| Distance Travelled                                 | Block 4                                |                   |                  |                  | ANOVA table                 | DF                        | F (DFn, DFd)                | P value      |                   |
|                                                    | Holm-Sidak's multiple comparisons test | Significant?      | Summary          | Adjusted P Value | Treatment (between columns) | 2                         | F (2, 18) = 16.91           | P < 0.0001   |                   |
|                                                    | Sham vs. Vehicle                       | Yes               | ****             | < 0.0001         | Residual (within columns)   | 18                        |                             |              |                   |
|                                                    | Sham vs. Ad-TMBIM6                     | Yes               | **               | 0.0082           | Total                       | 20                        |                             |              |                   |
|                                                    | Vehicle vs. Ad-TMBIM6                  | Yes               | *                | 0.04             |                             |                           |                             |              |                   |
| Distance Travelled                                 | Block 3                                |                   |                  |                  | ANOVA table                 | DF                        | F (DFn, DFd)                | P value      |                   |
|                                                    | Holm-Sidak's multiple comparisons test | Significant?      | Summary          | Adjusted P Value | Treatment (between columns) | 2                         | F (2, 19) = 9.318           | P = 0.0015   |                   |
|                                                    | Sham vs. Vehicle                       | Yes               | **               | 0.0012           | Residual (within columns)   | 19                        |                             |              |                   |
|                                                    | Sham vs. Ad-TMBIM6                     | Yes               | *                | 0.0228           | Total                       | 21                        |                             |              |                   |
|                                                    | Vehicle vs. Ad-TMBIM6                  | No                | ns               | 0.1766           |                             |                           |                             |              |                   |
| Distance Travelled                                 | Block 2                                |                   |                  |                  | ANOVA table                 | DF                        | F (DFn, DFd)                | P value      |                   |
|                                                    | Holm-Sidak's multiple comparisons test | Significant?      | Summary          | Adjusted P Value | Treatment (between columns) | 2                         | F (2, 19) = 17.44           | P < 0.0001   |                   |
|                                                    | Sham vs. Vehicle                       | Yes               | ****             | < 0.0001         | Residual (within columns)   | 19                        |                             |              |                   |
|                                                    | Sham vs. Ad-TMBIM6                     | Yes               | **               | 0.0022           | Total                       | 21                        |                             |              |                   |
|                                                    | Vehicle vs. Ad-TMBIM6                  | No                | ns               | 0.0738           |                             |                           |                             |              |                   |
| Distance Travelled                                 | Block 1                                |                   |                  |                  | ANOVA table                 | DF                        | F (DFn, DFd)                | P value      |                   |
|                                                    | Holm-Sidak's multiple comparisons test | Significant?      | Summary          | Adjusted P Value | Treatment (between columns) | 2                         | F (2, 19) = 0.9171          | P = 0.4167   |                   |
|                                                    | Sham vs. Vehicle                       | No                | ns               | 0.5226           | Residual (within columns)   | 19                        |                             |              |                   |
|                                                    | Sham vs. Ad-TMBIM6                     | No                | ns               | 0.5226           | Total                       | 21                        |                             |              |                   |
|                                                    | Vehicle vs. Ad-TMBIM6                  | No                | ns               | 0.9121           |                             |                           |                             |              |                   |
| Statistical Data Analysis for Fig. 3C              |                                        |                   |                  |                  |                             |                           |                             |              |                   |
| Brain Weight                                       | Tukey's multiple comparisons test      | 95% CI of diff.   | Significant?     | Summary          | Adjusted P Value            | ANOVA table               | DF                          | F (DFn, DFd) | P value           |
|                                                    |                                        | Sham vs. Vehicle  | 14.27 to 41.58   | Yes              | ***                         | 0.0002                    | Treatment (between columns) | 2            | F (2, 17) = 15.33 |
|                                                    | Sham vs. Ad-TMBIM6                     | -7.143 to 22.05   | No               | ns               | 0.409                       | Residual (within columns) | 17                          |              |                   |
|                                                    | Vehicle vs. Ad-TMBIM6                  | -34.13 to -6.820  | Yes              | **               | 0.0035                      | Total                     | 19                          |              |                   |
| Statistical Data Analysis for Fig. 3D              |                                        |                   |                  |                  |                             |                           |                             |              |                   |
| Tissue Loss                                        | Tukey's multiple comparisons test      | 95% CI of diff.   | Significant?     | Summary          | Adjusted P Value            | ANOVA table               | DF                          | F (DFn, DFd) | P value           |
|                                                    |                                        | Sham vs. Vehicle  | -47.01 to -31.72 | Yes              | ****                        | < 0.0001                  | Treatment (between columns) | 2            | F (2, 18) = 92.53 |
|                                                    | Sham vs. Ad-TMBIM6                     | -21.33 to -5.573  | Yes              | **               | 0.0011                      | Residual (within columns) | 18                          |              |                   |
|                                                    | Vehicle vs. Ad-TMBIM6                  | 18.59 to 33.24    | Yes              | ****             | < 0.0001                    | Total                     | 20                          |              |                   |

A summary excel spreadsheet showing detailed statistical analysis tests with exact p values, degrees of freedom and F values for foot fault, watermaze, brain weight measurements and tissue loss calculations. Data expressed as mean +/- SD; Test used was one-way ANOVA followed by Tukey multiple-comparison/or Holm-Sidak post hoc analysis (n=6-8)

**Table S4 Statistical Analysis showing the Effects of BI-1 on Percent Infarcted Area at 72h post-HI**

| Statistical Data Analysis for Fig. 4B            |                                     |                    |              |         |                  |                             |    |              |         |
|--------------------------------------------------|-------------------------------------|--------------------|--------------|---------|------------------|-----------------------------|----|--------------|---------|
| Percent Infarct Area for all intervention groups | Tukey's multiple comparisons test   | 95% CI of diff.    | Significant? | Summary | Adjusted P Value | ANOVA table                 |    |              | P value |
|                                                  |                                     |                    |              |         |                  | Treatment (between columns) | DF | F (DFn, DFd) |         |
|                                                  |                                     |                    |              |         |                  | Residual (within columns)   | 49 |              |         |
|                                                  |                                     |                    |              |         |                  | Total                       | 57 |              |         |
|                                                  | Sham vs. Vehicle                    | -41.39 to -30.18   | Yes          | ****    | < 0.0001         |                             |    |              |         |
|                                                  | Sham vs. Ad-TMBIM6                  | -23.74 to -12.53   | Yes          | ****    | < 0.0001         |                             |    |              |         |
|                                                  | Sham vs. BI-1 siRNA                 | -37.91 to -25.92   | Yes          | ****    | < 0.0001         |                             |    |              |         |
|                                                  | Sham vs. Scramble siRNA             | -26.65 to -14.67   | Yes          | ****    | < 0.0001         |                             |    |              |         |
|                                                  | Sham vs. IRE1 CRISPR (AP)           | -36.17 to -24.19   | Yes          | ****    | < 0.0001         |                             |    |              |         |
|                                                  | Sham vs. Control CRISPR             | -26.66 to -14.68   | Yes          | ****    | < 0.0001         |                             |    |              |         |
|                                                  | Sham vs. BI-1 siRNA                 | -41.04 to -29.06   | Yes          | ****    | < 0.0001         |                             |    |              |         |
|                                                  | Sham vs. Scramble siRNA             | -38.78 to -26.80   | Yes          | ****    | < 0.0001         |                             |    |              |         |
|                                                  | Vehicle vs. Ad-TMBIM6               | 12.46 to 22.84     | Yes          | ****    | < 0.0001         |                             |    |              |         |
|                                                  | Vehicle vs. BI-1 siRNA              | -1.735 to 9.473    | No           | ns      | 0.3976           |                             |    |              |         |
|                                                  | Vehicle vs. Scramble siRNA          | 9.521 to 20.73     | Yes          | ****    | < 0.0001         |                             |    |              |         |
|                                                  | Vehicle vs. IRE1 CRISPR (AP)        | -0.003741 to 11.20 | No           | ns      | 0.0503           |                             |    |              |         |
|                                                  | Vehicle vs. Control CRISPR          | 9.513 to 20.72     | Yes          | ****    | < 0.0001         |                             |    |              |         |
|                                                  | Vehicle vs. BI-1 siRNA              | -4.870 to 6.338    | No           | ns      | > 0.9999         |                             |    |              |         |
|                                                  | Vehicle vs. Scramble siRNA          | -2.609 to 8.600    | No           | ns      | 0.723            |                             |    |              |         |
|                                                  | Ad-TMBIM6 vs. BI-1 siRNA            | -19.38 to -8.175   | Yes          | ****    | < 0.0001         |                             |    |              |         |
|                                                  | Ad-TMBIM6 vs. Scramble siRNA        | -8.126 to 3.082    | No           | ns      | 0.868            |                             |    |              |         |
|                                                  | Ad-TMBIM6 vs. IRE1 CRISPR (AP)      | -17.65 to -6.443   | Yes          | ****    | < 0.0001         |                             |    |              |         |
|                                                  | Ad-TMBIM6 vs. Control CRISPR        | -8.135 to 3.074    | No           | ns      | 0.8659           |                             |    |              |         |
|                                                  | Ad-TMBIM6 vs. BI-1 siRNA            | -22.52 to -11.31   | Yes          | ****    | < 0.0001         |                             |    |              |         |
|                                                  | Ad-TMBIM6 vs. Scramble siRNA        | -20.26 to -9.048   | Yes          | ****    | < 0.0001         |                             |    |              |         |
|                                                  | BI-1 siRNA vs. Scramble siRNA       | 5.266 to 17.25     | Yes          | ****    | < 0.0001         |                             |    |              |         |
|                                                  | BI-1 siRNA vs. IRE1 CRISPR (AP)     | -4.259 to 7.723    | No           | ns      | 0.9895           |                             |    |              |         |
|                                                  | BI-1 siRNA vs. Control CRISPR       | 5.257 to 17.24     | Yes          | ****    | < 0.0001         |                             |    |              |         |
|                                                  | BI-1 siRNA vs. BI-1 siRNA           | -9.126 to 2.856    | No           | ns      | 0.745            |                             |    |              |         |
|                                                  | BI-1 siRNA vs. Scramble siRNA       | -6.864 to 5.118    | No           | ns      | > 0.9999         |                             |    |              |         |
|                                                  | Scramble siRNA vs. IRE1 CRISPR (AP) | -15.52 to -3.534   | Yes          | ***     | 0.0001           |                             |    |              |         |
|                                                  | Scramble siRNA vs. Control CRISPR   | -5.999 to 5.983    | No           | ns      | > 0.9999         |                             |    |              |         |
|                                                  | Scramble siRNA vs. BI-1 siRNA       | -20.38 to -8.401   | Yes          | ****    | < 0.0001         |                             |    |              |         |
|                                                  | Scramble siRNA vs. Scramble siRNA   | -18.12 to -6.139   | Yes          | ****    | < 0.0001         |                             |    |              |         |
|                                                  | IRE1 CRISPR (AP) vs. Control CRISPR | 3.526 to 15.51     | Yes          | ***     | 0.0001           |                             |    |              |         |
|                                                  | IRE1 CRISPR (AP) vs. BI-1 siRNA     | -10.86 to 1.124    | No           | ns      | 0.1989           |                             |    |              |         |
|                                                  | IRE1 CRISPR (AP) vs. Scramble siRNA | -8.596 to 3.386    | No           | ns      | 0.8883           |                             |    |              |         |
|                                                  | Control CRISPR vs. BI-1 siRNA       | -20.37 to -8.392   | Yes          | ****    | < 0.0001         |                             |    |              |         |
|                                                  | Control CRISPR vs. Scramble siRNA   | -18.11 to -6.131   | Yes          | ****    | < 0.0001         |                             |    |              |         |
|                                                  | BI-1 siRNA vs. Scramble siRNA       | -3.729 to 8.253    | No           | ns      | 0.947            |                             |    |              |         |

A summary excel spreadsheet showing detailed statistical analysis tests with exact p values, degrees of freedom and F values for percent infarcted area on mechanistic data. Data expressed as mean +/- SD; Test used was one-way ANOVA followed by Tukey multiple-comparison post hoc analysis (n=6)

**Table S5 Statistical Analysis for Western Blot Data Showing Expression of Pathway Proteins at 72h post-HI**

| Statistical Data Analysis for Fig. 5B |                                     |                     |              |          |                  |                             |                           |    |                   |            |
|---------------------------------------|-------------------------------------|---------------------|--------------|----------|------------------|-----------------------------|---------------------------|----|-------------------|------------|
|                                       | Tukey's multiple comparisons test   | 95% CI of diff.     | Significant? | Summary  | Adjusted P Value | ANOVA table                 |                           | DF | F (DFn, DFd)      | P value    |
|                                       |                                     |                     |              |          |                  | Treatment (between columns) | Residual (within columns) |    |                   |            |
| BI-1 Western Blot                     |                                     |                     |              |          |                  | Total                       | 52                        |    |                   |            |
|                                       | Sham vs. Vehicle                    | -0.3491 to 0.1348   | No           | ns       | 0.8744           |                             |                           | 8  | F (8, 44) = 10.12 | P < 0.0001 |
|                                       | Sham vs. Ad-TMBIM6                  | -0.6396 to -0.1557  | Yes          | ****     | < 0.0001         |                             |                           | 44 |                   |            |
|                                       | Sham vs. BI-1 siRNA                 | -0.2937 to 0.1902   | No           | ns       | 0.9986           |                             |                           |    |                   |            |
|                                       | Sham vs. Scramble siRNA             | -0.6640 to -0.1565  | Yes          | ***      | 0.0001           |                             |                           |    |                   |            |
|                                       | Sham vs. IRE1 CRISPR (AP)           | -0.3382 to 0.1457   | No           | ns       | 0.927            |                             |                           |    |                   |            |
|                                       | Sham vs. Control CRISPR             | -0.6706 to -0.1867  | Yes          | ****     | < 0.0001         |                             |                           |    |                   |            |
|                                       | Sham vs. BI-1 siRNA                 | -0.3469 to 0.1370   | No           | ns       | 0.8863           |                             |                           |    |                   |            |
|                                       | Sham vs. Scramble siRNA             | -0.3654 to 0.1185   | No           | ns       | 0.7644           |                             |                           |    |                   |            |
|                                       | Vehicle vs. Ad-TMBIM6               | -0.5325 to -0.04855 | Yes          | **       | 0.0086           |                             |                           |    |                   |            |
|                                       | Vehicle vs. BI-1 siRNA              | -0.1866 to 0.2973   | No           | ns       | 0.9977           |                             |                           |    |                   |            |
|                                       | Vehicle vs. Scramble siRNA          | -0.5569 to -0.04934 | Yes          | **       | 0.0091           |                             |                           |    |                   |            |
|                                       | Vehicle vs. IRE1 CRISPR (AP)        | -0.2311 to 0.2528   | No           | ns       | > 0.9999         |                             |                           |    |                   |            |
|                                       | Vehicle vs. Control CRISPR          | -0.5635 to -0.07955 | Yes          | **       | 0.0025           |                             |                           |    |                   |            |
|                                       | Vehicle vs. BI-1 siRNA              | -0.2398 to 0.2441   | No           | ns       | > 0.9999         |                             |                           |    |                   |            |
|                                       | Vehicle vs. Scramble siRNA          | -0.2583 to 0.2256   | No           | ns       | > 0.9999         |                             |                           |    |                   |            |
|                                       | Ad-TMBIM6 vs. BI-1 siRNA            | 0.1039 to 0.5878    | Yes          | ***      | 0.0009           |                             |                           |    |                   |            |
|                                       | Ad-TMBIM6 vs. Scramble siRNA        | -0.2664 to 0.2412   | No           | ns       | > 0.9999         |                             |                           |    |                   |            |
|                                       | Ad-TMBIM6 vs. IRE1 CRISPR (AP)      | 0.05943 to 0.5433   | Yes          | **       | 0.0056           |                             |                           |    |                   |            |
|                                       | Ad-TMBIM6 vs. Control CRISPR        | -0.2730 to 0.2110   | No           | ns       | > 0.9999         |                             |                           |    |                   |            |
|                                       | Ad-TMBIM6 vs. BI-1 siRNA            | 0.05073 to 0.5346   | Yes          | **       | 0.0079           |                             |                           |    |                   |            |
|                                       | Ad-TMBIM6 vs. Scramble siRNA        | 0.03221 to 0.5161   | Yes          | *        | 0.016            |                             |                           |    |                   |            |
|                                       | BI-1 siRNA vs. Scramble siRNA       | -0.6122 to -0.1047  | Yes          | **       | 0.0011           |                             |                           |    |                   |            |
|                                       | BI-1 siRNA vs. IRE1 CRISPR (AP)     | -0.2864 to 0.1975   | No           | ns       | 0.9995           |                             |                           |    |                   |            |
|                                       | BI-1 siRNA vs. Control CRISPR       | -0.6188 to -0.1349  | Yes          | ***      | 0.0002           |                             |                           |    |                   |            |
|                                       | BI-1 siRNA vs. BI-1 siRNA           | -0.2951 to 0.1888   | No           | ns       | 0.9983           |                             |                           |    |                   |            |
|                                       | BI-1 siRNA vs. Scramble siRNA       | -0.3136 to 0.1703   | No           | ns       | 0.9871           |                             |                           |    |                   |            |
|                                       | Scramble siRNA vs. IRE1 CRISPR (AP) | 0.06022 to 0.5677   | Yes          | **       | 0.0061           |                             |                           |    |                   |            |
|                                       | Scramble siRNA vs. Control CRISPR   | -0.2722 to 0.2354   | No           | ns       | > 0.9999         |                             |                           |    |                   |            |
|                                       | Scramble siRNA vs. BI-1 siRNA       | 0.05152 to 0.5590   | Yes          | **       | 0.0084           |                             |                           |    |                   |            |
| Scramble siRNA vs. Scramble siRNA     | 0.03300 to 0.5405                   | Yes                 | *            | 0.0164   |                  |                             |                           |    |                   |            |
| IRE1 CRISPR (AP) vs. Control CRISPR   | -0.5743 to -0.09043                 | Yes                 | **           | 0.0016   |                  |                             |                           |    |                   |            |
| IRE1 CRISPR (AP) vs. BI-1 siRNA       | -0.2507 to 0.2333                   | No                  | ns           | > 0.9999 |                  |                             |                           |    |                   |            |
| IRE1 CRISPR (AP) vs. Scramble siRNA   | -0.2692 to 0.2147                   | No                  | ns           | > 0.9999 |                  |                             |                           |    |                   |            |
| Control CRISPR vs. BI-1 siRNA         | 0.08173 to 0.5656                   | Yes                 | **           | 0.0023   |                  |                             |                           |    |                   |            |
| Control CRISPR vs. Scramble siRNA     | 0.06321 to 0.5471                   | Yes                 | **           | 0.0048   |                  |                             |                           |    |                   |            |
| BI-1 siRNA vs. Scramble siRNA         | -0.2605 to 0.2234                   | No                  | ns           | > 0.9999 |                  |                             |                           |    |                   |            |
| Statistical Data Analysis for Fig. 5C |                                     |                     |              |          |                  |                             |                           |    |                   |            |
|                                       | Tukey's multiple comparisons test   | 95% CI of diff.     | Significant? | Summary  | Adjusted P Value | ANOVA table                 |                           | DF | F (DFn, DFd)      | P value    |
|                                       |                                     |                     |              |          |                  | Treatment (between columns) | Residual (within columns) |    |                   |            |
| pIRE1 Western Blot                    |                                     |                     |              |          |                  | Total                       | 53                        |    |                   |            |
|                                       | Sham vs. Vehicle                    | -1.355 to -0.6996   | Yes          | ****     | < 0.0001         |                             |                           | 8  | F (8, 45) = 44.45 | P < 0.0001 |
|                                       | Sham vs. Ad-TMBIM6                  | -0.3282 to 0.3275   | No           | ns       | > 0.9999         |                             |                           | 45 |                   |            |
|                                       | Sham vs. BI-1 siRNA                 | -1.361 to -0.7052   | Yes          | ****     | < 0.0001         |                             |                           |    |                   |            |
|                                       | Sham vs. Scramble siRNA             | -0.4805 to 0.1752   | No           | ns       | 0.842            |                             |                           |    |                   |            |
|                                       | Sham vs. IRE1 CRISPR (AP)           | -1.266 to -0.6104   | Yes          | ****     | < 0.0001         |                             |                           |    |                   |            |
|                                       | Sham vs. Control CRISPR             | -0.5831 to 0.07266  | No           | ns       | 0.2431           |                             |                           |    |                   |            |
|                                       | Sham vs. BI-1 siRNA                 | -1.309 to -0.6534   | Yes          | ****     | < 0.0001         |                             |                           |    |                   |            |
|                                       | Sham vs. Scramble siRNA             | -1.293 to -0.6372   | Yes          | ****     | < 0.0001         |                             |                           |    |                   |            |
|                                       | Vehicle vs. Ad-TMBIM6               | 0.6992 to 1.355     | Yes          | ****     | < 0.0001         |                             |                           |    |                   |            |
|                                       | Vehicle vs. BI-1 siRNA              | -0.3335 to 0.3222   | No           | ns       | > 0.9999         |                             |                           |    |                   |            |
|                                       | Vehicle vs. Scramble siRNA          | 0.5470 to 1.203     | Yes          | ****     | < 0.0001         |                             |                           |    |                   |            |
|                                       | Vehicle vs. IRE1 CRISPR (AP)        | -0.2386 to 0.4171   | No           | ns       | 0.9926           |                             |                           |    |                   |            |
|                                       | Vehicle vs. Control CRISPR          | 0.4444 to 1.100     | Yes          | ****     | < 0.0001         |                             |                           |    |                   |            |
|                                       | Vehicle vs. BI-1 siRNA              | -0.2816 to 0.3741   | No           | ns       | > 0.9999         |                             |                           |    |                   |            |
|                                       | Vehicle vs. Scramble siRNA          | -0.2655 to 0.3902   | No           | ns       | 0.9994           |                             |                           |    |                   |            |
|                                       | Ad-TMBIM6 vs. BI-1 siRNA            | -1.361 to -0.7048   | Yes          | ****     | < 0.0001         |                             |                           |    |                   |            |
|                                       | Ad-TMBIM6 vs. Scramble siRNA        | -0.4801 to 0.1756   | No           | ns       | 0.8437           |                             |                           |    |                   |            |
|                                       | Ad-TMBIM6 vs. IRE1 CRISPR (AP)      | -1.266 to -0.6100   | Yes          | ****     | < 0.0001         |                             |                           |    |                   |            |
|                                       | Ad-TMBIM6 vs. Control CRISPR        | -0.5827 to 0.07302  | No           | ns       | 0.2448           |                             |                           |    |                   |            |
|                                       | Ad-TMBIM6 vs. BI-1 siRNA            | -1.309 to -0.6530   | Yes          | ****     | < 0.0001         |                             |                           |    |                   |            |
|                                       | Ad-TMBIM6 vs. Scramble siRNA        | -1.293 to -0.6369   | Yes          | ****     | < 0.0001         |                             |                           |    |                   |            |
|                                       | BI-1 siRNA vs. Scramble siRNA       | 0.5526 to 1.208     | Yes          | ****     | < 0.0001         |                             |                           |    |                   |            |
|                                       | BI-1 siRNA vs. IRE1 CRISPR (AP)     | -0.2330 to 0.4227   | No           | ns       | 0.989            |                             |                           |    |                   |            |
|                                       | BI-1 siRNA vs. Control CRISPR       | 0.4500 to 1.106     | Yes          | ****     | < 0.0001         |                             |                           |    |                   |            |
|                                       | BI-1 siRNA vs. BI-1 siRNA           | -0.2760 to 0.3797   | No           | ns       | 0.9998           |                             |                           |    |                   |            |
|                                       | BI-1 siRNA vs. Scramble siRNA       | -0.2599 to 0.3958   | No           | ns       | 0.9989           |                             |                           |    |                   |            |
|                                       | Scramble siRNA vs. IRE1 CRISPR (AP) | -1.113 to -0.4577   | Yes          | ****     | < 0.0001         |                             |                           |    |                   |            |
|                                       | Scramble siRNA vs. Control CRISPR   | -0.4304 to 0.2253   | No           | ns       | 0.982            |                             |                           |    |                   |            |
|                                       | Scramble siRNA vs. BI-1 siRNA       | -1.156 to -0.5007   | Yes          | ****     | < 0.0001         |                             |                           |    |                   |            |
| Scramble siRNA vs. Scramble siRNA     | -1.140 to -0.4846                   | Yes                 | ****         | < 0.0001 |                  |                             |                           |    |                   |            |
| IRE1 CRISPR (AP) vs. Control CRISPR   | 0.3552 to 1.011                     | Yes                 | ****         | < 0.0001 |                  |                             |                           |    |                   |            |
| IRE1 CRISPR (AP) vs. BI-1 siRNA       | -0.3709 to 0.2848                   | No                  | ns           | > 0.9999 |                  |                             |                           |    |                   |            |
| IRE1 CRISPR (AP) vs. Scramble siRNA   | -0.3547 to 0.3010                   | No                  | ns           | > 0.9999 |                  |                             |                           |    |                   |            |
| Control CRISPR vs. BI-1 siRNA         | -1.054 to -0.3982                   | Yes                 | ****         | < 0.0001 |                  |                             |                           |    |                   |            |
| Control CRISPR vs. Scramble siRNA     | -1.038 to -0.3820                   | Yes                 | ****         | < 0.0001 |                  |                             |                           |    |                   |            |
| BI-1 siRNA vs. Scramble siRNA         | -0.3117 to 0.3440                   | No                  | ns           | > 0.9999 |                  |                             |                           |    |                   |            |

| Statistical Data Analysis for Fig. 5D |                                       |                                   |                 |              |                  |                             |             |              |         |
|---------------------------------------|---------------------------------------|-----------------------------------|-----------------|--------------|------------------|-----------------------------|-------------|--------------|---------|
|                                       | Tukey's multiple comparisons test     | 95% CI of diff.                   | Significant?    | Summary      | Adjusted P Value | ANOVA table                 |             |              |         |
|                                       |                                       |                                   |                 |              |                  | Treatment (between columns) | DF          | F (DFn, DFd) | P value |
| XBP1 Western Blot                     |                                       |                                   |                 |              |                  | Residual (within columns)   | 45          |              |         |
|                                       |                                       |                                   |                 |              |                  | Total                       | 53          |              |         |
|                                       | Sham vs. Vehicle                      | -1.602 to -0.8492                 | Yes             | ****         | < 0.0001         |                             |             |              |         |
|                                       | Sham vs. Ad-TMBIM6                    | -0.5843 to 0.1687                 | No              | ns           | 0.6833           |                             |             |              |         |
|                                       | Sham vs. BI-1 siRNA                   | -1.226 to -0.4731                 | Yes             | ****         | < 0.0001         |                             |             |              |         |
|                                       | Sham vs. Scramble siRNA               | -0.8010 to -0.04798               | Yes             | *            | 0.0168           |                             |             |              |         |
|                                       | Sham vs. IRE1 CRISPR (AP)             | -1.383 to -0.6296                 | Yes             | ****         | < 0.0001         |                             |             |              |         |
|                                       | Sham vs. Control CRISPR               | -0.6559 to 0.09719                | No              | ns           | 0.3004           |                             |             |              |         |
|                                       | Sham vs. BI-1 siRNA                   | -1.646 to -0.8932                 | Yes             | ****         | < 0.0001         |                             |             |              |         |
|                                       | Sham vs. Scramble siRNA               | -1.233 to -0.4803                 | Yes             | ****         | < 0.0001         |                             |             |              |         |
|                                       | Vehicle vs. Ad-TMBIM6                 | 0.6414 to 1.394                   | Yes             | ****         | < 0.0001         |                             |             |              |         |
|                                       | Vehicle vs. BI-1 siRNA                | 0.0004880 to 0.7526               | No              | ns           | 0.0505           |                             |             |              |         |
|                                       | Vehicle vs. Scramble siRNA            | 0.4247 to 1.178                   | Yes             | ****         | < 0.0001         |                             |             |              |         |
|                                       | Vehicle vs. IRE1 CRISPR (AP)          | -0.1570 to 0.5961                 | No              | ns           | 0.6178           |                             |             |              |         |
|                                       | Vehicle vs. Control CRISPR            | 0.5698 to 1.323                   | Yes             | ****         | < 0.0001         |                             |             |              |         |
|                                       | Vehicle vs. BI-1 siRNA                | -0.4205 to 0.3325                 | No              | ns           | > 0.9999         |                             |             |              |         |
|                                       | Vehicle vs. Scramble siRNA            | -0.007655 to 0.7454               | No              | ns           | 0.0589           |                             |             |              |         |
|                                       | Ad-TMBIM6 vs. BI-1 siRNA              | -1.018 to -0.2653                 | Yes             | ****         | < 0.0001         |                             |             |              |         |
|                                       | Ad-TMBIM6 vs. Scramble siRNA          | -0.5932 to 0.1598                 | No              | ns           | 0.6339           |                             |             |              |         |
|                                       | Ad-TMBIM6 vs. IRE1 CRISPR (AP)        | -1.175 to -0.4218                 | Yes             | ****         | < 0.0001         |                             |             |              |         |
|                                       | Ad-TMBIM6 vs. Control CRISPR          | -0.4480 to 0.3050                 | No              | ns           | 0.9994           |                             |             |              |         |
|                                       | Ad-TMBIM6 vs. BI-1 siRNA              | -1.438 to -0.6854                 | Yes             | ****         | < 0.0001         |                             |             |              |         |
|                                       | Ad-TMBIM6 vs. Scramble siRNA          | -1.026 to -0.2725                 | Yes             | ****         | < 0.0001         |                             |             |              |         |
|                                       | BI-1 siRNA vs. Scramble siRNA         | 0.04865 to 0.8017                 | Yes             | *            | 0.0165           |                             |             |              |         |
|                                       | BI-1 siRNA vs. IRE1 CRISPR (AP)       | -0.5330 to 0.2200                 | No              | ns           | 0.9088           |                             |             |              |         |
|                                       | BI-1 siRNA vs. Control CRISPR         | 0.1938 to 0.9469                  | Yes             | ***          | 0.0004           |                             |             |              |         |
|                                       | BI-1 siRNA vs. BI-1 siRNA             | -0.7966 to -0.04353               | Yes             | *            | 0.0186           |                             |             |              |         |
|                                       | BI-1 siRNA vs. Scramble siRNA         | -0.3837 to 0.3694                 | No              | ns           | > 0.9999         |                             |             |              |         |
|                                       | Scramble siRNA vs. IRE1 CRISPR (AP)   | -0.9582 to -0.2051                | Yes             | ***          | 0.0003           |                             |             |              |         |
|                                       | Scramble siRNA vs. Control CRISPR     | -0.2314 to 0.5217                 | No              | ns           | 0.9387           |                             |             |              |         |
|                                       | Scramble siRNA vs. BI-1 siRNA         | -1.222 to -0.4687                 | Yes             | ****         | < 0.0001         |                             |             |              |         |
|                                       | Scramble siRNA vs. Scramble siRNA     | -0.8089 to -0.05581               | Yes             | *            | 0.0139           |                             |             |              |         |
|                                       | IRE1 CRISPR (AP) vs. Control CRISPR   | 0.3503 to 1.103                   | Yes             | ****         | < 0.0001         |                             |             |              |         |
|                                       | IRE1 CRISPR (AP) vs. BI-1 siRNA       | -0.6401 to 0.1130                 | No              | ns           | 0.3753           |                             |             |              |         |
|                                       | IRE1 CRISPR (AP) vs. Scramble siRNA   | -0.2272 to 0.5259                 | No              | ns           | 0.9286           |                             |             |              |         |
|                                       | Control CRISPR vs. BI-1 siRNA         | -1.367 to -0.6139                 | Yes             | ****         | < 0.0001         |                             |             |              |         |
|                                       | Control CRISPR vs. Scramble siRNA     | -0.9540 to -0.2010                | Yes             | ***          | 0.0003           |                             |             |              |         |
|                                       | BI-1 siRNA vs. Scramble siRNA         | 0.03636 to 0.7894                 | Yes             | *            | 0.022            |                             |             |              |         |
|                                       | Statistical Data Analysis for Fig. 5E |                                   |                 |              |                  |                             |             |              |         |
|                                       |                                       | Tukey's multiple comparisons test | 95% CI of diff. | Significant? | Summary          | Adjusted P Value            | ANOVA table |              |         |
| Treatment (between columns)           |                                       |                                   |                 |              |                  |                             | DF          | F (DFn, DFd) | P value |
| CHOP Western Blot                     |                                       |                                   |                 |              |                  | Residual (within columns)   | 45          |              |         |
|                                       |                                       |                                   |                 |              |                  | Total                       | 53          |              |         |
|                                       | Sham vs. Vehicle                      | -0.5863 to -0.2146                | Yes             | ****         | < 0.0001         |                             |             |              |         |
|                                       | Sham vs. Ad-TMBIM6                    | -0.2791 to 0.09250                | No              | ns           | 0.7803           |                             |             |              |         |
|                                       | Sham vs. BI-1 siRNA                   | -0.5347 to -0.1631                | Yes             | ****         | < 0.0001         |                             |             |              |         |
|                                       | Sham vs. Scramble siRNA               | -0.3436 to 0.02802                | No              | ns           | 0.1546           |                             |             |              |         |
|                                       | Sham vs. IRE1 CRISPR (AP)             | -0.5427 to -0.1710                | Yes             | ****         | < 0.0001         |                             |             |              |         |
|                                       | Sham vs. Control CRISPR               | -0.3051 to 0.06652                | No              | ns           | 0.4919           |                             |             |              |         |
|                                       | Sham vs. BI-1 siRNA                   | -0.5139 to -0.1423                | Yes             | ****         | < 0.0001         |                             |             |              |         |
|                                       | Sham vs. Scramble siRNA               | -0.4918 to -0.1202                | Yes             | ****         | < 0.0001         |                             |             |              |         |
|                                       | Vehicle vs. Ad-TMBIM6                 | 0.1213 to 0.4930                  | Yes             | ****         | < 0.0001         |                             |             |              |         |
|                                       | Vehicle vs. BI-1 siRNA                | -0.1342 to 0.2374                 | No              | ns           | 0.9916           |                             |             |              |         |
|                                       | Vehicle vs. Scramble siRNA            | 0.05687 to 0.4285                 | Yes             | **           | 0.0031           |                             |             |              |         |
|                                       | Vehicle vs. IRE1 CRISPR (AP)          | -0.1422 to 0.2294                 | No              | ns           | 0.9973           |                             |             |              |         |
|                                       | Vehicle vs. Control CRISPR            | 0.09537 to 0.4670                 | Yes             | ***          | 0.0004           |                             |             |              |         |
|                                       | Vehicle vs. BI-1 siRNA                | -0.1134 to 0.2582                 | No              | ns           | 0.9352           |                             |             |              |         |
|                                       | Vehicle vs. Scramble siRNA            | -0.09132 to 0.2803                | No              | ns           | 0.7687           |                             |             |              |         |
|                                       | Ad-TMBIM6 vs. BI-1 siRNA              | -0.4414 to -0.06977               | Yes             | **           | 0.0015           |                             |             |              |         |
|                                       | Ad-TMBIM6 vs. Scramble siRNA          | -0.2503 to 0.1213                 | No              | ns           | 0.9662           |                             |             |              |         |
|                                       | Ad-TMBIM6 vs. IRE1 CRISPR (AP)        | -0.4494 to -0.07775               | Yes             | ***          | 0.001            |                             |             |              |         |
|                                       | Ad-TMBIM6 vs. Control CRISPR          | -0.2118 to 0.1598                 | No              | ns           | > 0.9999         |                             |             |              |         |
|                                       | Ad-TMBIM6 vs. BI-1 siRNA              | -0.4206 to -0.04898               | Yes             | **           | 0.0047           |                             |             |              |         |
|                                       | Ad-TMBIM6 vs. Scramble siRNA          | -0.3985 to -0.02687               | Yes             | *            | 0.0143           |                             |             |              |         |
|                                       | BI-1 siRNA vs. Scramble siRNA         | 0.005282 to 0.3769                | Yes             | *            | 0.0396           |                             |             |              |         |
|                                       | BI-1 siRNA vs. IRE1 CRISPR (AP)       | -0.1938 to 0.1778                 | No              | ns           | > 0.9999         |                             |             |              |         |
|                                       | BI-1 siRNA vs. Control CRISPR         | 0.04378 to 0.4154                 | Yes             | **           | 0.0061           |                             |             |              |         |
|                                       | BI-1 siRNA vs. BI-1 siRNA             | -0.1650 to 0.2066                 | No              | ns           | > 0.9999         |                             |             |              |         |
|                                       | BI-1 siRNA vs. Scramble siRNA         | -0.1429 to 0.2287                 | No              | ns           | 0.9976           |                             |             |              |         |
|                                       | Scramble siRNA vs. IRE1 CRISPR (AP)   | -0.3849 to -0.01327               | Yes             | *            | 0.0275           |                             |             |              |         |
|                                       | Scramble siRNA vs. Control CRISPR     | -0.1473 to 0.2243                 | No              | ns           | 0.9989           |                             |             |              |         |
|                                       | Scramble siRNA vs. BI-1 siRNA         | -0.3561 to 0.01550                | No              | ns           | 0.0957           |                             |             |              |         |
|                                       | Scramble siRNA vs. Scramble siRNA     | -0.3340 to 0.03762                | No              | ns           | 0.2163           |                             |             |              |         |
|                                       | IRE1 CRISPR (AP) vs. Control CRISPR   | 0.05177 to 0.4234                 | Yes             | **           | 0.004            |                             |             |              |         |
|                                       | IRE1 CRISPR (AP) vs. BI-1 siRNA       | -0.1570 to 0.2146                 | No              | ns           | 0.9999           |                             |             |              |         |
|                                       | IRE1 CRISPR (AP) vs. Scramble siRNA   | -0.1349 to 0.2367                 | No              | ns           | 0.9923           |                             |             |              |         |
|                                       | Control CRISPR vs. BI-1 siRNA         | -0.3946 to -0.02300               | Yes             | *            | 0.0173           |                             |             |              |         |
|                                       | Control CRISPR vs. Scramble siRNA     | 0.3725 to -0.000819               | Yes             | *            | 0.0481           |                             |             |              |         |
|                                       | BI-1 siRNA vs. Scramble siRNA         | -0.1637 to 0.2079                 | No              | ns           | > 0.9999         |                             |             |              |         |

| Statistical Data Analysis for Fig. 5F |                                     |                     |              |         |                  |                             |    |                   |              |         |
|---------------------------------------|-------------------------------------|---------------------|--------------|---------|------------------|-----------------------------|----|-------------------|--------------|---------|
|                                       | Tukey's multiple comparisons test   | 95% CI of diff.     | Significant? | Summary | Adjusted P Value | ANOVA table                 |    | DF                | F (DFn, DFd) | P value |
|                                       |                                     |                     |              |         |                  | Treatment (between columns) | 8  | F (8, 45) = 15.15 | P < 0.0001   |         |
| ROMO1 Western Blot                    | Sham vs. Vehicle                    | -1.029 to -0.3636   | Yes          | ****    | < 0.0001         | Residual (within columns)   | 45 |                   |              |         |
|                                       | Sham vs. Ad-TMBIM6                  | -0.4161 to 0.2488   | No           | ns      | 0.9957           | Total                       | 53 |                   |              |         |
|                                       | Sham vs. BI-1 siRNA                 | -1.016 to -0.3508   | Yes          | ****    | < 0.0001         |                             |    |                   |              |         |
|                                       | Sham vs. Scramble siRNA             | -0.6037 to 0.06121  | No           | ns      | 0.1926           |                             |    |                   |              |         |
|                                       | Sham vs. IRE1 CRISPR (AP)           | -0.8917 to -0.2268  | Yes          | ****    | < 0.0001         |                             |    |                   |              |         |
|                                       | Sham vs. Control CRISPR             | -0.5397 to 0.1252   | No           | ns      | 0.5312           |                             |    |                   |              |         |
|                                       | Sham vs. BI-1 siRNA                 | -1.019 to -0.3542   | Yes          | ****    | < 0.0001         |                             |    |                   |              |         |
|                                       | Sham vs. Scramble siRNA             | -0.9488 to -0.2838  | Yes          | ****    | < 0.0001         |                             |    |                   |              |         |
|                                       | Vehicle vs. Ad-TMBIM6               | 0.2800 to 0.9449    | Yes          | ****    | < 0.0001         |                             |    |                   |              |         |
|                                       | Vehicle vs. BI-1 siRNA              | -0.3196 to 0.3453   | No           | ns      | > 0.9999         |                             |    |                   |              |         |
|                                       | Vehicle vs. Scramble siRNA          | 0.09234 to 0.7573   | Yes          | **      | 0.0041           |                             |    |                   |              |         |
|                                       | Vehicle vs. IRE1 CRISPR (AP)        | -0.1957 to 0.4693   | No           | ns      | 0.9134           |                             |    |                   |              |         |
|                                       | Vehicle vs. Control CRISPR          | 0.1563 to 0.8212    | Yes          | ***     | 0.0006           |                             |    |                   |              |         |
|                                       | Vehicle vs. BI-1 siRNA              | -0.3231 to 0.3418   | No           | ns      | > 0.9999         |                             |    |                   |              |         |
|                                       | Vehicle vs. Scramble siRNA          | -0.2527 to 0.4122   | No           | ns      | 0.9969           |                             |    |                   |              |         |
|                                       | Ad-TMBIM6 vs. BI-1 siRNA            | -0.9321 to -0.2671  | Yes          | ****    | < 0.0001         |                             |    |                   |              |         |
|                                       | Ad-TMBIM6 vs. Scramble siRNA        | -0.5201 to 0.1448   | No           | ns      | 0.6574           |                             |    |                   |              |         |
|                                       | Ad-TMBIM6 vs. IRE1 CRISPR (AP)      | -0.8081 to -0.1432  | Yes          | ***     | 0.0009           |                             |    |                   |              |         |
|                                       | Ad-TMBIM6 vs. Control CRISPR        | -0.4561 to 0.2088   | No           | ns      | 0.9497           |                             |    |                   |              |         |
|                                       | Ad-TMBIM6 vs. BI-1 siRNA            | -0.9355 to -0.2706  | Yes          | ****    | < 0.0001         |                             |    |                   |              |         |
|                                       | Ad-TMBIM6 vs. Scramble siRNA        | -0.8651 to -0.2002  | Yes          | ***     | 0.0001           |                             |    |                   |              |         |
|                                       | BI-1 siRNA vs. Scramble siRNA       | 0.07950 to 0.7444   | Yes          | **      | 0.0059           |                             |    |                   |              |         |
|                                       | BI-1 siRNA vs. IRE1 CRISPR (AP)     | -0.2085 to 0.4564   | No           | ns      | 0.949            |                             |    |                   |              |         |
|                                       | BI-1 siRNA vs. Control CRISPR       | 0.1435 to 0.8084    | Yes          | ***     | 0.0009           |                             |    |                   |              |         |
|                                       | BI-1 siRNA vs. BI-1 siRNA           | -0.3359 to 0.3290   | No           | ns      | > 0.9999         |                             |    |                   |              |         |
|                                       | BI-1 siRNA vs. Scramble siRNA       | -0.2655 to 0.3994   | No           | ns      | 0.9991           |                             |    |                   |              |         |
|                                       | Scramble siRNA vs. IRE1 CRISPR (AP) | -0.6205 to 0.04446  | No           | ns      | 0.1375           |                             |    |                   |              |         |
|                                       | Scramble siRNA vs. Control CRISPR   | -0.2685 to 0.3964   | No           | ns      | 0.9993           |                             |    |                   |              |         |
|                                       | Scramble siRNA vs. BI-1 siRNA       | -0.7479 to -0.08295 | Yes          | **      | 0.0054           |                             |    |                   |              |         |
|                                       | Scramble siRNA vs. Scramble siRNA   | -0.6775 to -0.01259 | Yes          | *       | 0.0366           |                             |    |                   |              |         |
| IRE1 CRISPR (AP) vs. Control CRISPR   | 0.01950 to 0.6844                   | Yes                 | *            | 0.0306  |                  |                             |    |                   |              |         |
| IRE1 CRISPR (AP) vs. BI-1 siRNA       | -0.4599 to 0.2050                   | No                  | ns           | 0.9407  |                  |                             |    |                   |              |         |
| IRE1 CRISPR (AP) vs. Scramble siRNA   | -0.3895 to 0.2754                   | No                  | ns           | 0.9997  |                  |                             |    |                   |              |         |
| Control CRISPR vs. BI-1 siRNA         | -0.8118 to -0.1469                  | Yes                 | ***          | 0.0008  |                  |                             |    |                   |              |         |
| Control CRISPR vs. Scramble siRNA     | -0.7415 to -0.07655                 | Yes                 | **           | 0.0064  |                  |                             |    |                   |              |         |
| BI-1 siRNA vs. Scramble siRNA         | -0.2621 to 0.4028                   | No                  | ns           | 0.9987  |                  |                             |    |                   |              |         |

A summary excel spreadsheet showing detailed statistical analysis tests with exact p values, degrees of freedom and F values for western blot experiments measuring the levels of pathway proteins. Data expressed as mean +/- SD; Test used was one-way ANOVA followed by Tukey multiple-comparison post hoc analysis (n=6)

**Table S6 Statistical Analysis for Western Blot Data Showing Expression of Apoptotic Markers at 72h post-HI**

| Statistical Data Analysis for Fig. 6B                                                     |                                        |                     |              |                  |                             |                             |                             |              |              |            |
|-------------------------------------------------------------------------------------------|----------------------------------------|---------------------|--------------|------------------|-----------------------------|-----------------------------|-----------------------------|--------------|--------------|------------|
|                                                                                           | Tukey's multiple comparisons test      | 95% CI of diff.     | Significant? | Summary          | Adjusted P Value            | ANOVA table                 |                             | DF           | F (DFn, DFd) | P value    |
|                                                                                           |                                        |                     |              |                  |                             | Treatment (between columns) | Residual (within columns)   |              |              |            |
| Bcl-2 Western Blot                                                                        | Sham vs. Vehicle                       | -0.3033 to 0.4743   | No           | ns               | 0.9983                      | 8                           | 45                          | 16.56        |              | P < 0.0001 |
|                                                                                           | Sham vs. Ad-TMBIM6                     | -0.8980 to -0.1204  | Yes          | **               | 0.003                       |                             | 53                          |              |              |            |
|                                                                                           | Sham vs. BI-1 siRNA                    | -0.3368 to 0.4408   | No           | ns               | > 0.9999                    |                             |                             |              |              |            |
|                                                                                           | Sham vs. Scramble siRNA                | -1.215 to -0.4374   | Yes          | ****             | < 0.0001                    |                             |                             |              |              |            |
|                                                                                           | Sham vs. IRE1 CRISPR (AP)              | -0.4976 to 0.2800   | No           | ns               | 0.9911                      |                             |                             |              |              |            |
|                                                                                           | Sham vs. Control CRISPR                | -0.8116 to -0.03404 | Yes          | *                | 0.0239                      |                             |                             |              |              |            |
|                                                                                           | Sham vs. BI-1 siRNA                    | -0.2472 to 0.5304   | No           | ns               | 0.9554                      |                             |                             |              |              |            |
|                                                                                           | Sham vs. Scramble siRNA                | -0.2577 to 0.5199   | No           | ns               | 0.9716                      |                             |                             |              |              |            |
|                                                                                           | Vehicle vs. Ad-TMBIM6                  | -0.9835 to -0.2059  | Yes          | ***              | 0.0003                      |                             |                             |              |              |            |
|                                                                                           | Vehicle vs. BI-1 siRNA                 | -0.4223 to 0.3553   | No           | ns               | > 0.9999                    |                             |                             |              |              |            |
|                                                                                           | Vehicle vs. Scramble siRNA             | -1.300 to -0.5229   | Yes          | ****             | < 0.0001                    |                             |                             |              |              |            |
|                                                                                           | Vehicle vs. IRE1 CRISPR (AP)           | -0.5831 to 0.1945   | No           | ns               | 0.7845                      |                             |                             |              |              |            |
|                                                                                           | Vehicle vs. Control CRISPR             | -0.8971 to -0.1195  | Yes          | **               | 0.003                       |                             |                             |              |              |            |
|                                                                                           | Vehicle vs. BI-1 siRNA                 | -0.3327 to 0.4449   | No           | ns               | > 0.9999                    |                             |                             |              |              |            |
|                                                                                           | Vehicle vs. Scramble siRNA             | -0.3432 to 0.4344   | No           | ns               | > 0.9999                    |                             |                             |              |              |            |
|                                                                                           | Ad-TMBIM6 vs. BI-1 siRNA               | 0.1724 to 0.9500    | Yes          | ***              | 0.0008                      |                             |                             |              |              |            |
|                                                                                           | Ad-TMBIM6 vs. Scramble siRNA           | -0.7058 to 0.07179  | No           | ns               | 0.1933                      |                             |                             |              |              |            |
|                                                                                           | Ad-TMBIM6 vs. IRE1 CRISPR (AP)         | 0.01154 to 0.7891   | Yes          | *                | 0.0392                      |                             |                             |              |              |            |
|                                                                                           | Ad-TMBIM6 vs. Control CRISPR           | -0.3025 to 0.4751   | No           | ns               | 0.9982                      |                             |                             |              |              |            |
|                                                                                           | Ad-TMBIM6 vs. BI-1 siRNA               | 0.2620 to 1.040     | Yes          | ****             | < 0.0001                    |                             |                             |              |              |            |
|                                                                                           | Ad-TMBIM6 vs. Scramble siRNA           | 0.2514 to 1.029     | Yes          | ****             | < 0.0001                    |                             |                             |              |              |            |
|                                                                                           | BI-1 siRNA vs. Scramble siRNA          | -1.267 to -0.4894   | Yes          | ****             | < 0.0001                    |                             |                             |              |              |            |
|                                                                                           | BI-1 siRNA vs. IRE1 CRISPR (AP)        | -0.5496 to 0.2280   | No           | ns               | 0.911                       |                             |                             |              |              |            |
|                                                                                           | BI-1 siRNA vs. Control CRISPR          | -0.8636 to -0.08604 | Yes          | **               | 0.007                       |                             |                             |              |              |            |
|                                                                                           | BI-1 siRNA vs. BI-1 siRNA              | -0.2992 to 0.4784   | No           | ns               | 0.9976                      |                             |                             |              |              |            |
|                                                                                           | BI-1 siRNA vs. Scramble siRNA          | -0.3097 to 0.4679   | No           | ns               | 0.999                       |                             |                             |              |              |            |
|                                                                                           | Scramble siRNA vs. IRE1 CRISPR (AP)    | 0.3285 to 1.106     | Yes          | ****             | < 0.0001                    |                             |                             |              |              |            |
|                                                                                           | Scramble siRNA vs. Control CRISPR      | 0.01454 to 0.7921   | Yes          | *                | 0.0367                      |                             |                             |              |              |            |
|                                                                                           | Scramble siRNA vs. BI-1 siRNA          | 0.5790 to 1.357     | Yes          | ****             | < 0.0001                    |                             |                             |              |              |            |
|                                                                                           | Scramble siRNA vs. Scramble siRNA      | 0.5684 to 1.346     | Yes          | ****             | < 0.0001                    |                             |                             |              |              |            |
| IRE1 CRISPR (AP) vs. Control CRISPR                                                       | 0.1000 to 0.5000                       | Yes                 | **           | 0.003            |                             |                             |                             |              |              |            |
| IRE1 CRISPR (AP) vs. BI-1 siRNA                                                           | -0.1384 to 0.6392                      | No                  | ns           | 0.4875           |                             |                             |                             |              |              |            |
| IRE1 CRISPR (AP) vs. Scramble siRNA                                                       | -0.1489 to 0.6287                      | No                  | ns           | 0.5449           |                             |                             |                             |              |              |            |
| Control CRISPR vs. BI-1 siRNA                                                             | 0.1756 to 0.9532                       | Yes                 | ***          | 0.0007           |                             |                             |                             |              |              |            |
| Control CRISPR vs. Scramble siRNA                                                         | 0.1651 to 0.9427                       | Yes                 | ***          | 0.0009           |                             |                             |                             |              |              |            |
| BI-1 siRNA vs. Scramble siRNA                                                             | -0.3993 to 0.3783                      | No                  | ns           | > 0.9999         |                             |                             |                             |              |              |            |
| Statistical Data Analysis for Fig. 6C                                                     |                                        |                     |              |                  |                             |                             |                             |              |              |            |
|                                                                                           | Holm-Sidak's multiple comparisons test | Significant?        | Summary      | Adjusted P Value | ANOVA table                 |                             | DF                          | F (DFn, DFd) | P value      |            |
| Bax Western Blot                                                                          | Sham vs. Vehicle                       | Yes                 | ****         | < 0.0001         | Treatment (between columns) | 6                           | 35                          | 10.21        | P < 0.0001   |            |
|                                                                                           | Sham vs. Ad-TMBIM6                     | No                  | ns           | 0.6122           | Residual (within columns)   |                             | 41                          |              |              |            |
|                                                                                           | Sham vs. BI-1 siRNA                    | Yes                 | ***          | 0.0007           | Total                       |                             |                             |              |              |            |
|                                                                                           | Sham vs. Scramble siRNA                | No                  | ns           | 0.6032           |                             |                             |                             |              |              |            |
|                                                                                           | Sham vs. IRE1 CRISPR (AP)              | Yes                 | ***          | 0.0007           |                             |                             |                             |              |              |            |
|                                                                                           | Sham vs. Control CRISPR                | No                  | ns           | 0.9051           |                             |                             |                             |              |              |            |
|                                                                                           | Vehicle vs. Ad-TMBIM6                  | Yes                 | **           | 0.0045           |                             |                             |                             |              |              |            |
|                                                                                           | Vehicle vs. BI-1 siRNA                 | No                  | ns           | 0.903            |                             |                             |                             |              |              |            |
|                                                                                           | Vehicle vs. Scramble siRNA             | Yes                 | **           | 0.0051           |                             |                             |                             |              |              |            |
|                                                                                           | Vehicle vs. IRE1 CRISPR (AP)           | No                  | ns           | 0.903            |                             |                             |                             |              |              |            |
|                                                                                           | Vehicle vs. Control CRISPR             | Yes                 | ***          | 0.0003           |                             |                             |                             |              |              |            |
|                                                                                           | Ad-TMBIM6 vs. BI-1 siRNA               | Yes                 | *            | 0.048            |                             |                             |                             |              |              |            |
|                                                                                           | Ad-TMBIM6 vs. Scramble siRNA           | No                  | ns           | 0.9969           |                             |                             |                             |              |              |            |
|                                                                                           | Ad-TMBIM6 vs. IRE1 CRISPR (AP)         | Yes                 | *            | 0.047            |                             |                             |                             |              |              |            |
|                                                                                           | Ad-TMBIM6 vs. Control CRISPR           | No                  | ns           | 0.903            |                             |                             |                             |              |              |            |
|                                                                                           | BI-1 siRNA vs. Scramble siRNA          | Yes                 | *            | 0.0481           |                             |                             |                             |              |              |            |
|                                                                                           | BI-1 siRNA vs. IRE1 CRISPR (AP)        | No                  | ns           | 0.9969           |                             |                             |                             |              |              |            |
|                                                                                           | BI-1 siRNA vs. Control CRISPR          | Yes                 | **           | 0.0038           |                             |                             |                             |              |              |            |
|                                                                                           | Scramble siRNA vs. IRE1 CRISPR (AP)    | Yes                 | *            | 0.048            |                             |                             |                             |              |              |            |
|                                                                                           | Scramble siRNA vs. Control CRISPR      | No                  | ns           | 0.903            |                             |                             |                             |              |              |            |
| IRE1 CRISPR (AP) vs. Control CRISPR                                                       | Yes                                    | **                  | 0.0036       |                  |                             |                             |                             |              |              |            |
| Comparison of all groups vs BI-1 siRNA and scramble siRNA only groups (Without Ad-TMBIM6) |                                        |                     |              |                  |                             |                             |                             |              |              |            |
|                                                                                           | Holm-Sidak's multiple comparisons test | Mean Diff.          | Significant? | Summary          | Adjusted P Value            | F                           | ANOVA table                 | DF           |              |            |
| Bax Western Blot                                                                          | Sham vs. BI-1 siRNA                    | -0.6107             | Yes          | *                | 0.0102                      | 7.18                        | Treatment (between columns) | 2            |              |            |
|                                                                                           | Sham vs. Scramble siRNA                | -0.5364             | Yes          | *                | 0.0161                      | 7.18                        | Residual (within columns)   | 15           |              |            |
|                                                                                           | Vehicle vs. BI-1 siRNA                 | 0.1752              | No           | ns               | 0.6314                      | 0.8279                      | Total                       | 17           |              |            |
|                                                                                           | Vehicle vs. Scramble siRNA             | 0.2495              | No           | ns               | 0.5423                      | 0.8279                      |                             |              |              |            |
|                                                                                           | Ad-TMBIM6 vs. BI-1 siRNA               | -0.3835             | No           | ns               | 0.1308                      | 2.672                       |                             |              |              |            |
|                                                                                           | Ad-TMBIM6 vs. Scramble siRNA           | -0.3092             | No           | ns               | 0.1888                      | 2.672                       |                             |              |              |            |
|                                                                                           | BI-1 siRNA vs. BI-1 siRNA              | 0.04422             | No           | ns               | 0.9342                      | 0.1496                      |                             |              |              |            |
|                                                                                           | BI-1 siRNA vs. Scramble siRNA          | 0.1186              | No           | ns               | 0.9342                      | 0.1496                      |                             |              |              |            |
|                                                                                           | Scramble siRNA vs. BI-1 siRNA          | -0.3738             | No           | ns               | 0.1442                      | 2.531                       |                             |              |              |            |
|                                                                                           | Scramble siRNA vs. Scramble siRNA      | -0.2994             | No           | ns               | 0.2067                      | 2.531                       |                             |              |              |            |
|                                                                                           | IRE1 CRISPR (AP) vs. BI-1 siRNA        | 0.04967             | No           | ns               | 0.9299                      | 0.1672                      |                             |              |              |            |
|                                                                                           | IRE1 CRISPR (AP) vs. Scramble siRNA    | 0.124               | No           | ns               | 0.9228                      | 0.1672                      |                             |              |              |            |
|                                                                                           | Control CRISPR vs. BI-1 siRNA          | -0.5254             | Yes          | *                | 0.0338                      | 4.866                       |                             |              |              |            |
|                                                                                           | Control CRISPR vs. Scramble siRNA      | -0.451              | Yes          | *                | 0.0499                      | 4.861                       |                             |              |              |            |
| BI-1 siRNA vs. Scramble siRNA                                                             | 0.07437                                | No                  | ns           | 0.6784           | 7.18                        |                             |                             |              |              |            |



| Statistical Data Analysis for Fig. 6D                                                     |                             |    |                   |            |                                          |                     |                  |                  |        |  |
|-------------------------------------------------------------------------------------------|-----------------------------|----|-------------------|------------|------------------------------------------|---------------------|------------------|------------------|--------|--|
| CC3 Western Blot                                                                          | ANOVA table                 | DF | F (DFn, DFd)      | P value    | Holm-Sidak's multiple comparisons test   |                     |                  |                  |        |  |
|                                                                                           | Treatment (between columns) | 6  | F (6, 35) = 14.87 | P < 0.0001 | Significant?                             | Summary             | Adjusted P Value |                  |        |  |
|                                                                                           | Residual (within columns)   | 35 |                   |            | Sham vs. Vehicle                         | Yes                 | ****             | < 0.0001         |        |  |
|                                                                                           | Total                       | 41 |                   |            | Sham vs. Ad-TMBIM6                       | No                  | ns               | 0.9103           |        |  |
|                                                                                           |                             |    |                   |            | Sham vs. BI-1 siRNA                      | Yes                 | ***              | 0.0005           |        |  |
|                                                                                           |                             |    |                   |            | Sham vs. Scramble siRNA                  | No                  | ns               | 0.4918           |        |  |
|                                                                                           |                             |    |                   |            | Sham vs. IRE1 CRISPR (AP)                | Yes                 | ***              | 0.0005           |        |  |
|                                                                                           |                             |    |                   |            | Sham vs. Control CRISPR                  | No                  | ns               | 0.6166           |        |  |
|                                                                                           |                             |    |                   |            | Vehicle vs. Ad-TMBIM6                    | Yes                 | ****             | < 0.0001         |        |  |
|                                                                                           |                             |    |                   |            | Vehicle vs. BI-1 siRNA                   | No                  | ns               | 0.0772           |        |  |
|                                                                                           |                             |    |                   |            | Vehicle vs. Scramble siRNA               | Yes                 | ****             | < 0.0001         |        |  |
|                                                                                           |                             |    |                   |            | Vehicle vs. IRE1 CRISPR (AP)             | No                  | ns               | 0.0772           |        |  |
|                                                                                           |                             |    |                   |            | Vehicle vs. Control CRISPR               | Yes                 | ****             | < 0.0001         |        |  |
|                                                                                           |                             |    |                   |            | Ad-TMBIM6 vs. BI-1 siRNA                 | Yes                 | **               | 0.0056           |        |  |
|                                                                                           |                             |    |                   |            | Ad-TMBIM6 vs. Scramble siRNA             | No                  | ns               | 0.9103           |        |  |
|                                                                                           |                             |    |                   |            | Ad-TMBIM6 vs. IRE1 CRISPR (AP)           | Yes                 | **               | 0.0056           |        |  |
|                                                                                           |                             |    |                   |            | Ad-TMBIM6 vs. Control CRISPR             | No                  | ns               | 0.9103           |        |  |
|                                                                                           |                             |    |                   |            | BI-1 siRNA vs. Scramble siRNA            | Yes                 | *                | 0.0467           |        |  |
|                                                                                           |                             |    |                   |            | BI-1 siRNA vs. IRE1 CRISPR (AP)          | No                  | ns               | 0.9996           |        |  |
|                                                                                           |                             |    |                   |            | BI-1 siRNA vs. Control CRISPR            | Yes                 | *                | 0.0285           |        |  |
|                                                                                           |                             |    |                   |            | Scramble siRNA vs. IRE1 CRISPR (AP)      | Yes                 | *                | 0.0467           |        |  |
|                                                                                           |                             |    |                   |            | Scramble siRNA vs. Control CRISPR        | No                  | ns               | 0.9613           |        |  |
|                                                                                           |                             |    |                   |            | IRE1 CRISPR (AP) vs. Control CRISPR      | Yes                 | *                | 0.0285           |        |  |
| Comparison of all groups vs BI-1 siRNA and scramble siRNA only groups (Without Ad-TMBIM6) |                             |    |                   |            |                                          |                     |                  |                  |        |  |
| CC3 Western blot                                                                          | ANOVA table                 | DF | F (DFn, DFd)      | P value    | Dunnnett's multiple comparisons test     |                     |                  |                  |        |  |
|                                                                                           | Treatment (between columns) | 8  | F (8, 45) = 7.726 | P < 0.0001 | 95% CI of diff.                          | Significant?        | Summary          | Adjusted P Value |        |  |
|                                                                                           | Residual (within columns)   | 45 |                   |            | Sham vs. BI-1 siRNA                      | -1.010 to -0.2422   | Yes              | ***              | 0.0004 |  |
|                                                                                           | Total                       | 53 |                   |            | Sham vs. Scramble siRNA                  | -0.9584 to -0.1909  | Yes              | **               | 0.0011 |  |
|                                                                                           |                             |    |                   |            | Vehicle vs. BI-1 siRNA                   | -0.2400 to 0.5275   | No               | ns               | 0.8653 |  |
|                                                                                           |                             |    |                   |            | Vehicle vs. Scramble siRNA               | -0.1888 to 0.5787   | No               | ns               | 0.6186 |  |
|                                                                                           |                             |    |                   |            | Ad-TMBIM6 vs. BI-1 siRNA                 | -0.9233 to -0.1558  | Yes              | **               | 0.0024 |  |
|                                                                                           |                             |    |                   |            | Ad-TMBIM6 vs. Scramble siRNA             | -0.8721 to -0.1045  | Yes              | **               | 0.007  |  |
|                                                                                           |                             |    |                   |            | BI-1 siRNA vs. BI-1 siRNA                | -0.5224 to 0.2452   | No               | ns               | 0.8843 |  |
|                                                                                           |                             |    |                   |            | BI-1 siRNA vs. Scramble siRNA            | -0.4711 to 0.2964   | No               | ns               | 0.9904 |  |
|                                                                                           |                             |    |                   |            | Scramble siRNA vs. BI-1 siRNA            | -0.8332 to -0.06571 | Yes              | *                | 0.015  |  |
|                                                                                           |                             |    |                   |            | Scramble siRNA vs. Scramble siRNA        | -0.7820 to -0.01445 | Yes              | *                | 0.0388 |  |
|                                                                                           |                             |    |                   |            | IRE1 CRISPR (AP) vs. BI-1 siRNA only     | -0.5224 to 0.2451   | No               | ns               | 0.8842 |  |
|                                                                                           |                             |    |                   |            | IRE1 CRISPR (AP) vs. Scramble siRNA only | -0.4711 to 0.2964   | No               | ns               | 0.9904 |  |
|                                                                                           |                             |    |                   |            | Control CRISPR vs. BI-1 siRNA            | -0.8588 to -0.09128 | Yes              | **               | 0.0091 |  |
|                                                                                           |                             |    |                   |            | Control CRISPR vs. Scramble siRNA        | -0.8075 to -0.04001 | Yes              | *                | 0.0244 |  |
|                                                                                           |                             |    |                   |            | BI-1 siRNA vs. Scramble siRNA            | -0.4711 to 0.2964   | No               | ns               | 0.9904 |  |

A summary excel spreadsheet showing detailed statistical analysis tests with exact p values, degrees of freedom and F values for western blot experiments measuring the levels of ER stress induced apoptotic markers. Data expressed as mean +/- SD; Test used was one-way ANOVA followed by Tukey multiple-comparison/Holm-Sidak/Dunnnett's post hoc analysis (n=6)

**Table S7 Statistical Analysis for *in vitro* Cell Viability Studies after OGD**

| Statistical Data Analysis for Fig. 7A |                                   |                  |              |         |                  |                             |    |                   |            |
|---------------------------------------|-----------------------------------|------------------|--------------|---------|------------------|-----------------------------|----|-------------------|------------|
| Time Under OGD                        | Tukey's multiple comparisons test | 95% CI of diff.  | Significant? | Summary | Adjusted P Value | ANOVA table                 | DF | F (DFn, DFd)      | P value    |
|                                       | Control vs. 1h                    | -2.132 to 24.94  | No           | ns      | 0.1353           | Treatment (between columns) | 5  | F (5, 25) = 55.57 | P < 0.0001 |
|                                       | Control vs. 1.5h                  | -2.685 to 23.13  | No           | ns      | 0.1808           | Residual (within columns)   | 25 |                   |            |
|                                       | Control vs. 3h                    | 32.48 to 58.30   | Yes          | ****    | < 0.0001         | Total                       | 30 |                   |            |
|                                       | Control vs. 5h                    | 38.23 to 64.05   | Yes          | ****    | < 0.0001         |                             |    |                   |            |
|                                       | Control vs. 6h                    | 39.05 to 75.56   | Yes          | ****    | < 0.0001         |                             |    |                   |            |
|                                       | 1h vs. 1.5h                       | -14.72 to 12.35  | No           | ns      | 0.9998           |                             |    |                   |            |
|                                       | 1h vs. 3h                         | 20.45 to 47.52   | Yes          | ****    | < 0.0001         |                             |    |                   |            |
|                                       | 1h vs. 5h                         | 26.20 to 53.27   | Yes          | ****    | < 0.0001         |                             |    |                   |            |
|                                       | 1h vs. 6h                         | 27.20 to 64.60   | Yes          | ****    | < 0.0001         |                             |    |                   |            |
|                                       | 1.5h vs. 3h                       | 22.26 to 48.07   | Yes          | ****    | < 0.0001         |                             |    |                   |            |
|                                       | 1.5h vs. 5h                       | 28.01 to 53.82   | Yes          | ****    | < 0.0001         |                             |    |                   |            |
|                                       | 1.5h vs. 6h                       | 28.83 to 65.34   | Yes          | ****    | < 0.0001         |                             |    |                   |            |
|                                       | 3h vs. 5h                         | -7.157 to 18.66  | No           | ns      | 0.7421           |                             |    |                   |            |
|                                       | 3h vs. 6h                         | -6.336 to 30.17  | No           | ns      | 0.3639           |                             |    |                   |            |
| 5h vs. 6h                             | -12.09 to 24.42                   | No               | ns           | 0.8993  |                  |                             |    |                   |            |
|                                       |                                   |                  |              |         |                  |                             |    |                   |            |
|                                       |                                   |                  |              |         |                  |                             |    |                   |            |
| Statistical Data Analysis for Fig. 7B |                                   |                  |              |         |                  |                             |    |                   |            |
| MOI Test                              | Tukey's multiple comparisons test | 95% CI of diff.  | Significant? | Summary | Adjusted P Value | ANOVA table                 | DF | F (DFn, DFd)      | P value    |
|                                       | Control vs. Vehicle               | 26.31 to 56.74   | Yes          | ****    | < 0.0001         | Treatment (between columns) | 5  | F (5, 30) = 18.79 | P < 0.0001 |
|                                       | Control vs. 100 MOI               | -13.88 to 16.55  | No           | ns      | 0.9998           | Residual (within columns)   | 30 |                   |            |
|                                       | Control vs. 200 MOI               | 5.242 to 35.67   | Yes          | **      | 0.0037           | Total                       | 35 |                   |            |
|                                       | Control vs. 500 MOI               | -3.716 to 26.72  | No           | ns      | 0.2259           |                             |    |                   |            |
|                                       | Control vs. 1000 MOI              | 4.367 to 34.80   | Yes          | **      | 0.0058           |                             |    |                   |            |
|                                       | Vehicle vs. 100 MOI               | -55.41 to -24.98 | Yes          | ****    | < 0.0001         |                             |    |                   |            |
|                                       | Vehicle vs. 200 MOI               | -36.29 to -5.854 | Yes          | **      | 0.0027           |                             |    |                   |            |
|                                       | Vehicle vs. 500 MOI               | -45.24 to -14.81 | Yes          | ****    | < 0.0001         |                             |    |                   |            |
|                                       | Vehicle vs. 1000 MOI              | -37.16 to -6.729 | Yes          | **      | 0.0017           |                             |    |                   |            |
|                                       | 100 MOI vs. 200 MOI               | 3.909 to 34.34   | Yes          | **      | 0.0074           |                             |    |                   |            |
|                                       | 100 MOI vs. 500 MOI               | -5.049 to 25.38  | No           | ns      | 0.3488           |                             |    |                   |            |
|                                       | 100 MOI vs. 1000 MOI              | 3.034 to 33.47   | Yes          | *       | 0.0116           |                             |    |                   |            |
|                                       | 200 MOI vs. 500 MOI               | -24.17 to 6.258  | No           | ns      | 0.4865           |                             |    |                   |            |
|                                       | 200 MOI vs. 1000 MOI              | -16.09 to 14.34  | No           | ns      | > 0.9999         |                             |    |                   |            |
| 500 MOI vs. 1000 MOI                  | -7.133 to 23.30                   | No               | ns           | 0.595   |                  |                             |    |                   |            |

| Statistical Data Analysis for Fig. 7D |                                   |                  |              |         |                  |                             |                           |    |                    |            |
|---------------------------------------|-----------------------------------|------------------|--------------|---------|------------------|-----------------------------|---------------------------|----|--------------------|------------|
| Cell Viability                        | Tukey's multiple comparisons test | 95% CI of diff.  | Significant? | Summary | Adjusted P Value | ANOVA table                 |                           | DF | F (DFn, DFd)       | P value    |
|                                       |                                   |                  |              |         |                  | Treatment (between columns) | Residual (within columns) |    |                    |            |
|                                       | Control vs. Vehicle               | 40.61 to 62.60   | Yes          | ****    | < 0.0001         | 10                          | 69                        | 10 | F (10, 69) = 82.47 | P < 0.0001 |
|                                       | Control vs. Ad-TMBIM6             | -8.728 to 13.27  | No           | ns      | 0.9998           |                             |                           | 79 |                    |            |
|                                       | Control vs. Scramble siRNA        | 8.002 to 30.77   | Yes          | ****    | < 0.0001         |                             |                           |    |                    |            |
|                                       | Control vs. BI-1 siRNA            | 34.94 to 55.81   | Yes          | ****    | < 0.0001         |                             |                           |    |                    |            |
|                                       | Control vs. DMSO                  | 3.518 to 28.60   | Yes          | **      | 0.0029           |                             |                           |    |                    |            |
|                                       | Control vs. APY-29                | 45.69 to 69.45   | Yes          | ****    | < 0.0001         |                             |                           |    |                    |            |
|                                       | Control vs. CCT020312             | 32.28 to 57.36   | Yes          | ****    | < 0.0001         |                             |                           |    |                    |            |
|                                       | Control vs. STF-083010            | -2.119 to 19.26  | No           | ns      | 0.2356           |                             |                           |    |                    |            |
|                                       | Control vs. Control CRISPR        | 5.162 to 28.92   | Yes          | ***     | 0.0005           |                             |                           |    |                    |            |
|                                       | Control vs. PERK CRISPR           | 41.90 to 63.89   | Yes          | ****    | < 0.0001         |                             |                           |    |                    |            |
|                                       | Vehicle vs. Ad-TMBIM6             | -60.33 to -38.34 | Yes          | ****    | < 0.0001         |                             |                           |    |                    |            |
|                                       | Vehicle vs. Scramble siRNA        | -43.60 to -20.83 | Yes          | ****    | < 0.0001         |                             |                           |    |                    |            |
|                                       | Vehicle vs. BI-1 siRNA            | -16.66 to 4.204  | No           | ns      | 0.6578           |                             |                           |    |                    |            |
|                                       | Vehicle vs. DMSO                  | -48.09 to -23.01 | Yes          | ****    | < 0.0001         |                             |                           |    |                    |            |
|                                       | Vehicle vs. APY-29                | -5.914 to 17.84  | No           | ns      | 0.8444           |                             |                           |    |                    |            |
|                                       | Vehicle vs. CCT020312             | -19.32 to 5.760  | No           | ns      | 0.7761           |                             |                           |    |                    |            |
|                                       | Vehicle vs. STF-083010            | -53.72 to -32.35 | Yes          | ****    | < 0.0001         |                             |                           |    |                    |            |
|                                       | Vehicle vs. Control CRISPR        | -46.44 to -22.68 | Yes          | ****    | < 0.0001         |                             |                           |    |                    |            |
|                                       | Vehicle vs. PERK CRISPR           | -9.706 to 12.29  | No           | ns      | > 0.9999         |                             |                           |    |                    |            |
|                                       | Ad-TMBIM6 vs. Scramble siRNA      | 5.732 to 28.50   | Yes          | ***     | 0.0002           |                             |                           |    |                    |            |
|                                       | Ad-TMBIM6 vs. BI-1 siRNA          | 32.67 to 53.54   | Yes          | ****    | < 0.0001         |                             |                           |    |                    |            |
|                                       | Ad-TMBIM6 vs. DMSO                | 1.248 to 26.33   | Yes          | *       | 0.0196           |                             |                           |    |                    |            |
|                                       | Ad-TMBIM6 vs. APY-29              | 43.42 to 67.18   | Yes          | ****    | < 0.0001         |                             |                           |    |                    |            |
|                                       | Ad-TMBIM6 vs. CCT020312           | 30.01 to 55.09   | Yes          | ****    | < 0.0001         |                             |                           |    |                    |            |
|                                       | Ad-TMBIM6 vs. STF-083010          | -4.389 to 16.99  | No           | ns      | 0.6749           |                             |                           |    |                    |            |
|                                       | Ad-TMBIM6 vs. Control CRISPR      | 2.892 to 26.65   | Yes          | **      | 0.0043           |                             |                           |    |                    |            |
|                                       | Ad-TMBIM6 vs. PERK CRISPR         | 39.63 to 61.62   | Yes          | ****    | < 0.0001         |                             |                           |    |                    |            |
|                                       | Scramble siRNA vs. BI-1 siRNA     | 15.15 to 36.83   | Yes          | ****    | < 0.0001         |                             |                           |    |                    |            |
|                                       | Scramble siRNA vs. DMSO           | -16.21 to 9.551  | No           | ns      | 0.9986           |                             |                           |    |                    |            |
|                                       | Scramble siRNA vs. APY-29         | 25.95 to 50.42   | Yes          | ****    | < 0.0001         |                             |                           |    |                    |            |
|                                       | Scramble siRNA vs. CCT020312      | 12.56 to 38.32   | Yes          | ****    | < 0.0001         |                             |                           |    |                    |            |
|                                       | Scramble siRNA vs. STF-083010     | -21.90 to 0.2673 | No           | ns      | 0.0619           |                             |                           |    |                    |            |
|                                       | Scramble siRNA vs. Control CRISPR | -14.58 to 9.892  | No           | ns      | 0.9999           |                             |                           |    |                    |            |
|                                       | Scramble siRNA vs. PERK CRISPR    | 22.13 to 44.89   | Yes          | ****    | < 0.0001         |                             |                           |    |                    |            |
|                                       | BI-1 siRNA vs. DMSO               | -41.36 to -17.27 | Yes          | ****    | < 0.0001         |                             |                           |    |                    |            |
|                                       | BI-1 siRNA vs. APY-29             | 0.8360 to 23.55  | Yes          | *       | 0.0252           |                             |                           |    |                    |            |
|                                       | BI-1 siRNA vs. CCT020312          | -12.60 to 11.50  | No           | ns      | > 0.9999         |                             |                           |    |                    |            |
|                                       | BI-1 siRNA vs. STF-083010         | -46.91 to -26.70 | Yes          | ****    | < 0.0001         |                             |                           |    |                    |            |
|                                       | BI-1 siRNA vs. Control CRISPR     | -39.69 to -16.97 | Yes          | ****    | < 0.0001         |                             |                           |    |                    |            |
|                                       | BI-1 siRNA vs. PERK CRISPR        | -2.913 to 17.95  | No           | ns      | 0.3821           |                             |                           |    |                    |            |
|                                       | DMSO vs. APY-29                   | 28.19 to 54.83   | Yes          | ****    | < 0.0001         |                             |                           |    |                    |            |
|                                       | DMSO vs. CCT020312                | 14.86 to 42.68   | Yes          | ****    | < 0.0001         |                             |                           |    |                    |            |
|                                       | DMSO vs. STF-083010               | -19.76 to 4.780  | No           | ns      | 0.6278           |                             |                           |    |                    |            |
|                                       | DMSO vs. Control CRISPR           | -12.34 to 14.30  | No           | ns      | > 0.9999         |                             |                           |    |                    |            |
|                                       | DMSO vs. PERK CRISPR              | 24.30 to 49.38   | Yes          | ****    | < 0.0001         |                             |                           |    |                    |            |
|                                       | APY-29 vs. CCT020312              | 26.06 to 0.5745  | No           | ns      | 0.0728           |                             |                           |    |                    |            |
|                                       | APY-29 vs. STF-083010             | -60.59 to -37.41 | Yes          | ****    | < 0.0001         |                             |                           |    |                    |            |
|                                       | APY-29 vs. Control CRISPR         | -53.23 to -27.83 | Yes          | ****    | < 0.0001         |                             |                           |    |                    |            |
|                                       | APY-29 vs. PERK CRISPR            | -16.55 to 7.205  | No           | ns      | 0.964            |                             |                           |    |                    |            |
|                                       | CCT020312 vs. STF-083010          | -48.52 to -23.99 | Yes          | ****    | < 0.0001         |                             |                           |    |                    |            |
|                                       | CCT020312 vs. Control CRISPR      | -41.10 to -14.46 | Yes          | ****    | < 0.0001         |                             |                           |    |                    |            |
|                                       | CCT020312 vs. PERK CRISPR         | -4.469 to 20.61  | No           | ns      | 0.552            |                             |                           |    |                    |            |
|                                       | STF-083010 vs. Control CRISPR     | -3.120 to 20.06  | No           | ns      | 0.3619           |                             |                           |    |                    |            |
|                                       | STF-083010 vs. PERK CRISPR        | 33.64 to 55.01   | Yes          | ****    | < 0.0001         |                             |                           |    |                    |            |
|                                       | Control CRISPR vs. PERK CRISPR    | 23.98 to 47.73   | Yes          | ****    | < 0.0001         |                             |                           |    |                    |            |

A summary excel spreadsheet showing detailed statistical analysis tests with exact p values, degrees of freedom and F values for the percent cell viability data. Data expressed as mean +/- SD; Test used was one-way ANOVA followed by Tukey multiple-comparison post hoc analysis (n=6)

**Table S8 Statistical Analysis for Protein Expression Levels of Pathway Proteins after OGD**

| Statistical Data Analysis for Fig. 8B |                    |              |         |                  |  |                             |    |                    |            |
|---------------------------------------|--------------------|--------------|---------|------------------|--|-----------------------------|----|--------------------|------------|
| Tukey's multiple comparisons test     | 95% CI of diff.    | Significant? | Summary | Adjusted P Value |  | ANOVA table                 | DF | F (DFn, DFd)       | P value    |
|                                       |                    |              |         |                  |  | Treatment (between columns) | 10 | F (10, 54) = 9.784 | P < 0.0001 |
| Control vs. Vehicle                   | -0.9614 to 0.5107  | No           | ns      | 0.9936           |  | Residual (within columns)   | 54 |                    |            |
| Control vs. Ad-TMBIM6                 | -1.752 to -0.2799  | Yes          | **      | 0.0011           |  | Total                       | 64 |                    |            |
| Control vs. Scramble siRNA            | -1.846 to -0.3735  | Yes          | ***     | 0.0002           |  |                             |    |                    |            |
| Control vs. BI-1 siRNA                | -0.6351 to 0.8370  | No           | ns      | > 0.9999         |  |                             |    |                    |            |
| Control vs. DMSO                      | -1.674 to -0.2021  | Yes          | **      | 0.0034           |  |                             |    |                    |            |
| Control vs. APY-29                    | -1.038 to 0.4338   | No           | ns      | 0.9482           |  |                             |    |                    |            |
| Control vs. CCT020312                 | -1.681 to -0.2090  | Yes          | **      | 0.0031           |  |                             |    |                    |            |
| Control vs. STF-083010                | -1.791 to -0.3190  | Yes          | ***     | 0.0006           |  |                             |    |                    |            |
| Control vs. Control CRISPR            | -1.816 to -0.2719  | Yes          | **      | 0.0015           |  |                             |    |                    |            |
| Control vs. PERK CRISPR               | -1.909 to -0.4368  | Yes          | ****    | < 0.0001         |  |                             |    |                    |            |
| Vehicle vs. Ad-TMBIM6                 | -1.527 to -0.05455 | Yes          | *       | 0.0256           |  |                             |    |                    |            |
| Vehicle vs. Scramble siRNA            | -1.620 to -0.1481  | Yes          | **      | 0.0073           |  |                             |    |                    |            |
| Vehicle vs. BI-1 siRNA                | -0.4097 to 1.062   | No           | ns      | 0.9169           |  |                             |    |                    |            |
| Vehicle vs. DMSO                      | -1.449 to 0.02322  | Yes          | ns      | 0.0456           |  |                             |    |                    |            |
| Vehicle vs. APY-29                    | -0.8129 to 0.6592  | No           | ns      | > 0.9999         |  |                             |    |                    |            |
| Vehicle vs. CCT020312                 | -1.456 to 0.01635  | No           | ns      | 0.0606           |  |                             |    |                    |            |
| Vehicle vs. STF-083010                | -1.566 to -0.09363 | Yes          | *       | 0.0154           |  |                             |    |                    |            |
| Vehicle vs. Control CRISPR            | -1.591 to -0.04658 | Yes          | *       | 0.029            |  |                             |    |                    |            |
| Vehicle vs. PERK CRISPR               | -1.683 to -0.2114  | Yes          | **      | 0.003            |  |                             |    |                    |            |
| Ad-TMBIM6 vs. Scramble siRNA          | -0.8296 to 0.6425  | No           | ns      | > 0.9999         |  |                             |    |                    |            |
| Ad-TMBIM6 vs. BI-1 siRNA              | 0.3809 to 1.853    | Yes          | ***     | 0.0002           |  |                             |    |                    |            |
| Ad-TMBIM6 vs. DMSO                    | -0.6583 to 0.8138  | No           | ns      | > 0.9999         |  |                             |    |                    |            |
| Ad-TMBIM6 vs. APY-29                  | -0.02230 to 1.450  | Yes          | ns      | 0.0449           |  |                             |    |                    |            |
| Ad-TMBIM6 vs. CCT020312               | -0.6651 to 0.8069  | No           | ns      | > 0.9999         |  |                             |    |                    |            |
| Ad-TMBIM6 vs. STF-083010              | -0.7751 to 0.6970  | No           | ns      | > 0.9999         |  |                             |    |                    |            |
| Ad-TMBIM6 vs. Control CRISPR          | -0.7999 to 0.7440  | No           | ns      | > 0.9999         |  |                             |    |                    |            |
| Ad-TMBIM6 vs. PERK CRISPR             | -0.8929 to 0.5792  | No           | ns      | 0.9997           |  |                             |    |                    |            |
| Scramble siRNA vs. BI-1 siRNA         | 0.4744 to 1.946    | Yes          | ****    | < 0.0001         |  |                             |    |                    |            |
| Scramble siRNA vs. DMSO               | -0.5647 to 0.9074  | No           | ns      | 0.9993           |  |                             |    |                    |            |
| Scramble siRNA vs. APY-29             | 0.07125 to 1.543   | Yes          | *       | 0.0206           |  |                             |    |                    |            |
| Scramble siRNA vs. CCT020312          | -0.5716 to 0.9005  | No           | ns      | 0.9995           |  |                             |    |                    |            |
| Scramble siRNA vs. STF-083010         | -0.6816 to 0.7905  | No           | ns      | > 0.9999         |  |                             |    |                    |            |
| Scramble siRNA vs. Control CRISPR     | -0.7064 to 0.8376  | No           | ns      | > 0.9999         |  |                             |    |                    |            |
| Scramble siRNA vs. PERK CRISPR        | -0.7994 to 0.6727  | No           | ns      | > 0.9999         |  |                             |    |                    |            |
| BI-1 siRNA vs. DMSO                   | -1.775 to -0.3031  | Yes          | ***     | 0.0007           |  |                             |    |                    |            |
| BI-1 siRNA vs. APY-29                 | -1.139 to 0.3329   | No           | ns      | 0.751            |  |                             |    |                    |            |
| BI-1 siRNA vs. CCT020312              | -1.782 to -0.3100  | Yes          | ***     | 0.0007           |  |                             |    |                    |            |
| BI-1 siRNA vs. STF-083010             | -1.892 to -0.4200  | Yes          | ***     | 0.0001           |  |                             |    |                    |            |
| BI-1 siRNA vs. Control CRISPR         | -1.917 to -0.3729  | Yes          | ***     | 0.0003           |  |                             |    |                    |            |
| BI-1 siRNA vs. PERK CRISPR            | -2.010 to -0.5377  | Yes          | ****    | < 0.0001         |  |                             |    |                    |            |
| DMSO vs. APY-29                       | -0.1001 to 1.372   | No           | ns      | 0.1493           |  |                             |    |                    |            |
| DMSO vs. CCT020312                    | -0.7429 to 0.7292  | No           | ns      | > 0.9999         |  |                             |    |                    |            |
| DMSO vs. STF-083010                   | -0.8529 to 0.6192  | No           | ns      | > 0.9999         |  |                             |    |                    |            |
| DMSO vs. Control CRISPR               | -0.8777 to 0.6662  | No           | ns      | > 0.9999         |  |                             |    |                    |            |
| DMSO vs. PERK CRISPR                  | -0.9707 to 0.5014  | No           | ns      | 0.9913           |  |                             |    |                    |            |
| APY-29 vs. CCT020312                  | -1.379 to 0.09320  | No           | ns      | 0.1394           |  |                             |    |                    |            |
| APY-29 vs. STF-083010                 | -1.489 to -0.01678 | Yes          | *       | 0.0409           |  |                             |    |                    |            |
| APY-29 vs. Control CRISPR             | -1.514 to 0.03027  | Yes          | ns      | 0.0499           |  |                             |    |                    |            |
| APY-29 vs. PERK CRISPR                | -1.607 to -0.1346  | Yes          | **      | 0.0088           |  |                             |    |                    |            |
| CCT020312 vs. STF-083010              | -0.8460 to 0.6261  | No           | ns      | > 0.9999         |  |                             |    |                    |            |
| CCT020312 vs. Control CRISPR          | -0.8708 to 0.6731  | No           | ns      | > 0.9999         |  |                             |    |                    |            |
| CCT020312 vs. PERK CRISPR             | -0.9638 to 0.5083  | No           | ns      | 0.9931           |  |                             |    |                    |            |
| STF-083010 vs. Control CRISPR         | -0.7608 to 0.7831  | No           | ns      | > 0.9999         |  |                             |    |                    |            |
| STF-083010 vs. PERK CRISPR            | -0.8538 to 0.6183  | No           | ns      | > 0.9999         |  |                             |    |                    |            |
| Control CRISPR vs. PERK CRISPR        | -0.9009 to 0.6431  | No           | ns      | > 0.9999         |  |                             |    |                    |            |

Bi-1 Western Blot

Statistical Data Analysis for Fig. 8C

|                                   | Statistical Data Analysis for Fig. 8C |                 |              |          |                  | ANOVA table                 | DF | F (DFn, DFd)       | P value    |
|-----------------------------------|---------------------------------------|-----------------|--------------|----------|------------------|-----------------------------|----|--------------------|------------|
|                                   | Tukey's multiple comparisons test     | 95% CI of diff. | Significant? | Summary  | Adjusted P Value |                             |    |                    |            |
|                                   |                                       |                 |              |          |                  | Treatment (between columns) | 10 | F (10, 55) = 26.07 | P < 0.0001 |
| Control vs. Vehicle               | -1.268 to -0.5391                     | Yes             | ****         | < 0.0001 |                  | Residual (within columns)   | 55 |                    |            |
| Control vs. Ad-TMBIM6             | -0.6357 to 0.09348                    | No              | ns           | 0.329    |                  | Total                       | 65 |                    |            |
| Control vs. Scramble siRNA        | -0.6327 to 0.09642                    | No              | ns           | 0.3443   |                  |                             |    |                    |            |
| Control vs. BI-1 siRNA            | -1.256 to -0.5269                     | Yes             | ****         | < 0.0001 |                  |                             |    |                    |            |
| Control vs. DMSO                  | -0.6661 to 0.06302                    | No              | ns           | 0.1943   |                  |                             |    |                    |            |
| Control vs. APY-29                | -1.141 to -0.4117                     | Yes             | ****         | < 0.0001 |                  |                             |    |                    |            |
| Control vs. CCT020312             | -1.297 to -0.5677                     | Yes             | ****         | < 0.0001 |                  |                             |    |                    |            |
| Control vs. STF-083010            | -0.3155 to 0.4137                     | No              | ns           | > 0.9999 |                  |                             |    |                    |            |
| Control vs. Control CRISPR        | -0.5480 to 0.1812                     | No              | ns           | 0.8346   |                  |                             |    |                    |            |
| Control vs. PERK CRISPR           | -1.266 to -0.5369                     | Yes             | ****         | < 0.0001 |                  |                             |    |                    |            |
| Vehicle vs. Ad-TMBIM6             | 0.2680 to 0.9972                      | Yes             | ****         | < 0.0001 |                  |                             |    |                    |            |
| Vehicle vs. Scramble siRNA        | 0.2710 to 1.000                       | Yes             | ****         | < 0.0001 |                  |                             |    |                    |            |
| Vehicle vs. BI-1 siRNA            | -0.3524 to 0.3767                     | No              | ns           | > 0.9999 |                  |                             |    |                    |            |
| Vehicle vs. DMSO                  | 0.2376 to 0.9667                      | Yes             | ****         | < 0.0001 |                  |                             |    |                    |            |
| Vehicle vs. APY-29                | -0.2372 to 0.4919                     | No              | ns           | 0.9829   |                  |                             |    |                    |            |
| Vehicle vs. CCT020312             | -0.3932 to 0.3359                     | No              | ns           | > 0.9999 |                  |                             |    |                    |            |
| Vehicle vs. STF-083010            | 0.5882 to 1.317                       | Yes             | ****         | < 0.0001 |                  |                             |    |                    |            |
| Vehicle vs. Control CRISPR        | 0.3557 to 1.085                       | Yes             | ****         | < 0.0001 |                  |                             |    |                    |            |
| Vehicle vs. PERK CRISPR           | -0.3624 to 0.3667                     | No              | ns           | > 0.9999 |                  |                             |    |                    |            |
| Ad-TMBIM6 vs. Scramble siRNA      | -0.3616 to 0.3675                     | No              | ns           | > 0.9999 |                  |                             |    |                    |            |
| Ad-TMBIM6 vs. BI-1 siRNA          | -0.9850 to -0.2559                    | Yes             | ****         | < 0.0001 |                  |                             |    |                    |            |
| Ad-TMBIM6 vs. DMSO                | -0.3950 to 0.3341                     | No              | ns           | > 0.9999 |                  |                             |    |                    |            |
| Ad-TMBIM6 vs. APY-29              | -0.8698 to -0.1407                    | Yes             | ***          | 0.001    |                  |                             |    |                    |            |
| Ad-TMBIM6 vs. CCT020312           | -1.026 to -0.2967                     | Yes             | ****         | < 0.0001 |                  |                             |    |                    |            |
| Ad-TMBIM6 vs. STF-083010          | -0.04436 to 0.6848                    | No              | ns           | 0.1346   |                  |                             |    |                    |            |
| Ad-TMBIM6 vs. Control CRISPR      | -0.2769 to 0.4523                     | No              | ns           | 0.9991   |                  |                             |    |                    |            |
| Ad-TMBIM6 vs. PERK CRISPR         | -0.9950 to -0.2659                    | Yes             | ****         | < 0.0001 |                  |                             |    |                    |            |
| Scramble siRNA vs. BI-1 siRNA     | -0.9879 to -0.2588                    | Yes             | ****         | < 0.0001 |                  |                             |    |                    |            |
| Scramble siRNA vs. DMSO           | -0.3980 to 0.3312                     | No              | ns           | > 0.9999 |                  |                             |    |                    |            |
| Scramble siRNA vs. APY-29         | -0.8727 to -0.1436                    | Yes             | ***          | 0.0009   |                  |                             |    |                    |            |
| Scramble siRNA vs. CCT020312      | -1.029 to -0.2996                     | Yes             | ****         | < 0.0001 |                  |                             |    |                    |            |
| Scramble siRNA vs. STF-083010     | -0.04729 to 0.6819                    | No              | ns           | 0.1429   |                  |                             |    |                    |            |
| Scramble siRNA vs. Control CRISPR | -0.2798 to 0.4493                     | No              | ns           | 0.9994   |                  |                             |    |                    |            |
| Scramble siRNA vs. PERK CRISPR    | -0.9979 to -0.2688                    | Yes             | ****         | < 0.0001 |                  |                             |    |                    |            |
| BI-1 siRNA vs. DMSO               | 0.2254 to 0.9545                      | Yes             | ****         | < 0.0001 |                  |                             |    |                    |            |
| BI-1 siRNA vs. APY-29             | -0.2494 to 0.4798                     | No              | ns           | 0.9919   |                  |                             |    |                    |            |
| BI-1 siRNA vs. CCT020312          | -0.4054 to 0.3238                     | No              | ns           | > 0.9999 |                  |                             |    |                    |            |
| BI-1 siRNA vs. STF-083010         | 0.5761 to 1.305                       | Yes             | ****         | < 0.0001 |                  |                             |    |                    |            |
| BI-1 siRNA vs. Control CRISPR     | 0.3436 to 1.073                       | Yes             | ****         | < 0.0001 |                  |                             |    |                    |            |
| BI-1 siRNA vs. PERK CRISPR        | -0.3746 to 0.3546                     | No              | ns           | > 0.9999 |                  |                             |    |                    |            |
| DMSO vs. APY-29                   | -0.8393 to -0.1102                    | Yes             | **           | 0.0025   |                  |                             |    |                    |            |
| DMSO vs. CCT020312                | -0.9953 to -0.2662                    | Yes             | ****         | < 0.0001 |                  |                             |    |                    |            |
| DMSO vs. STF-083010               | -0.01389 to 0.7153                    | No              | ns           | 0.0693   |                  |                             |    |                    |            |
| DMSO vs. Control CRISPR           | -0.2464 to 0.4827                     | No              | ns           | 0.9902   |                  |                             |    |                    |            |
| DMSO vs. PERK CRISPR              | -0.9645 to -0.2354                    | Yes             | ****         | < 0.0001 |                  |                             |    |                    |            |
| APY-29 vs. CCT020312              | -0.5206 to 0.2086                     | No              | ns           | 0.9333   |                  |                             |    |                    |            |
| APY-29 vs. STF-083010             | 0.4609 to 1.190                       | Yes             | ****         | < 0.0001 |                  |                             |    |                    |            |
| APY-29 vs. Control CRISPR         | 0.2284 to 0.9575                      | Yes             | ****         | < 0.0001 |                  |                             |    |                    |            |
| APY-29 vs. PERK CRISPR            | -0.4898 to 0.2394                     | No              | ns           | 0.9849   |                  |                             |    |                    |            |
| CCT020312 vs. STF-083010          | 0.6169 to 1.346                       | Yes             | ****         | < 0.0001 |                  |                             |    |                    |            |
| CCT020312 vs. Control CRISPR      | 0.3844 to 1.114                       | Yes             | ****         | < 0.0001 |                  |                             |    |                    |            |
| CCT020312 vs. PERK CRISPR         | -0.3338 to 0.3954                     | No              | ns           | > 0.9999 |                  |                             |    |                    |            |
| STF-083010 vs. Control CRISPR     | -0.5971 to 0.1321                     | No              | ns           | 0.5542   |                  |                             |    |                    |            |
| STF-083010 vs. PERK CRISPR        | -1.315 to -0.5861                     | Yes             | ****         | < 0.0001 |                  |                             |    |                    |            |
| Control CRISPR vs. PERK CRISPR    | -1.083 to -0.3536                     | Yes             | ****         | < 0.0001 |                  |                             |    |                    |            |

pIRE1 Western Blot

| Statistical Data Analysis for Fig. 8D |                     |              |         |                  |                             |    |                               |
|---------------------------------------|---------------------|--------------|---------|------------------|-----------------------------|----|-------------------------------|
| Tukey's multiple comparisons test     | 95% CI of diff.     | Significant? | Summary | Adjusted P Value | ANOVA table                 | DF | F (DFn, DFd) P value          |
|                                       |                     |              |         |                  | Treatment (between columns) | 10 | F (10, 44) = 27.90 P < 0.0001 |
| Control vs. Vehicle                   | -0.7482 to -0.3560  | Yes          | ****    | < 0.0001         | Residual (within columns)   | 44 |                               |
| Control vs. Ad-TMBIM6                 | -0.4093 to -0.01704 | Yes          | *       | 0.0232           | Total                       | 54 |                               |
| Control vs. Scramble siRNA            | 0.3836 to 0.008598  | No           | ns      | 0.072            |                             |    |                               |
| Control vs. BI-1 siRNA                | -0.7691 to -0.3769  | Yes          | ****    | < 0.0001         |                             |    |                               |
| Control vs. DMSO                      | -0.4056 to -0.01334 | Yes          | *       | 0.0275           |                             |    |                               |
| Control vs. APY-29                    | 0.4002 to -0.007946 | Yes          | *       | 0.0352           |                             |    |                               |
| Control vs. CCT020312                 | -0.7763 to -0.3841  | Yes          | ****    | < 0.0001         |                             |    |                               |
| Control vs. STF-083010                | -0.3722 to 0.02003  | No           | ns      | 0.1139           |                             |    |                               |
| Control vs. Control CRISPR            | -0.3800 to 0.01223  | No           | ns      | 0.0836           |                             |    |                               |
| Control vs. PERK CRISPR               | -0.1617 to 0.2306   | No           | ns      | > 0.9999         |                             |    |                               |
| Vehicle vs. Ad-TMBIM6                 | 0.1428 to 0.5350    | Yes          | ****    | < 0.0001         |                             |    |                               |
| Vehicle vs. Scramble siRNA            | 0.1684 to 0.5607    | Yes          | ****    | < 0.0001         |                             |    |                               |
| Vehicle vs. BI-1 siRNA                | -0.2170 to 0.1752   | No           | ns      | > 0.9999         |                             |    |                               |
| Vehicle vs. DMSO                      | 0.1465 to 0.5387    | Yes          | ****    | < 0.0001         |                             |    |                               |
| Vehicle vs. APY-29                    | 0.1519 to 0.5441    | Yes          | ****    | < 0.0001         |                             |    |                               |
| Vehicle vs. CCT020312                 | -0.2242 to 0.1680   | No           | ns      | > 0.9999         |                             |    |                               |
| Vehicle vs. STF-083010                | 0.1799 to 0.5721    | Yes          | ****    | < 0.0001         |                             |    |                               |
| Vehicle vs. Control CRISPR            | 0.1721 to 0.5643    | Yes          | ****    | < 0.0001         |                             |    |                               |
| Vehicle vs. PERK CRISPR               | 0.3904 to 0.7826    | Yes          | ****    | < 0.0001         |                             |    |                               |
| Ad-TMBIM6 vs. Scramble siRNA          | -0.1705 to 0.2218   | No           | ns      | > 0.9999         |                             |    |                               |
| Ad-TMBIM6 vs. BI-1 siRNA              | -0.5560 to -0.1637  | Yes          | ****    | < 0.0001         |                             |    |                               |
| Ad-TMBIM6 vs. DMSO                    | -0.1924 to 0.1998   | No           | ns      | > 0.9999         |                             |    |                               |
| Ad-TMBIM6 vs. APY-29                  | -0.1870 to 0.2052   | No           | ns      | > 0.9999         |                             |    |                               |
| Ad-TMBIM6 vs. CCT020312               | -0.5631 to -0.1709  | Yes          | ****    | < 0.0001         |                             |    |                               |
| Ad-TMBIM6 vs. STF-083010              | -0.1591 to 0.2332   | No           | ns      | 0.9999           |                             |    |                               |
| Ad-TMBIM6 vs. Control CRISPR          | -0.1668 to 0.2254   | No           | ns      | > 0.9999         |                             |    |                               |
| Ad-TMBIM6 vs. PERK CRISPR             | 0.05149 to 0.4437   | Yes          | **      | 0.0042           |                             |    |                               |
| Scramble siRNA vs. BI-1 siRNA         | -0.5816 to -0.1894  | Yes          | ****    | < 0.0001         |                             |    |                               |
| Scramble siRNA vs. DMSO               | -0.2181 to 0.1742   | No           | ns      | > 0.9999         |                             |    |                               |
| Scramble siRNA vs. APY-29             | -0.2127 to 0.1796   | No           | ns      | > 0.9999         |                             |    |                               |
| Scramble siRNA vs. CCT020312          | -0.5888 to -0.1965  | Yes          | ****    | < 0.0001         |                             |    |                               |
| Scramble siRNA vs. STF-083010         | -0.1847 to 0.2076   | No           | ns      | > 0.9999         |                             |    |                               |
| Scramble siRNA vs. Control CRISPR     | -0.1925 to 0.1998   | No           | ns      | > 0.9999         |                             |    |                               |
| Scramble siRNA vs. PERK CRISPR        | 0.02585 to 0.4181   | Yes          | *       | 0.0152           |                             |    |                               |
| BI-1 siRNA vs. DMSO                   | 0.1674 to 0.5597    | Yes          | ****    | < 0.0001         |                             |    |                               |
| BI-1 siRNA vs. APY-29                 | 0.1728 to 0.5651    | Yes          | ****    | < 0.0001         |                             |    |                               |
| BI-1 siRNA vs. CCT020312              | -0.2033 to 0.1889   | No           | ns      | > 0.9999         |                             |    |                               |
| BI-1 siRNA vs. STF-083010             | 0.2008 to 0.5930    | Yes          | ****    | < 0.0001         |                             |    |                               |
| BI-1 siRNA vs. Control CRISPR         | 0.1930 to 0.5852    | Yes          | ****    | < 0.0001         |                             |    |                               |
| BI-1 siRNA vs. PERK CRISPR            | 0.4113 to 0.8036    | Yes          | ****    | < 0.0001         |                             |    |                               |
| DMSO vs. APY-29                       | -0.1907 to 0.2015   | No           | ns      | > 0.9999         |                             |    |                               |
| DMSO vs. CCT020312                    | -0.5668 to -0.1746  | Yes          | ****    | < 0.0001         |                             |    |                               |
| DMSO vs. STF-083010                   | -0.1628 to 0.2295   | No           | ns      | > 0.9999         |                             |    |                               |
| DMSO vs. Control CRISPR               | -0.1705 to 0.2217   | No           | ns      | > 0.9999         |                             |    |                               |
| DMSO vs. PERK CRISPR                  | 0.04779 to 0.4400   | Yes          | **      | 0.0051           |                             |    |                               |
| APY-29 vs. CCT020312                  | -0.5722 to -0.1800  | Yes          | ****    | < 0.0001         |                             |    |                               |
| APY-29 vs. STF-083010                 | -0.1681 to 0.2241   | No           | ns      | > 0.9999         |                             |    |                               |
| APY-29 vs. Control CRISPR             | -0.1759 to 0.2163   | No           | ns      | > 0.9999         |                             |    |                               |
| APY-29 vs. PERK CRISPR                | 0.04239 to 0.4346   | Yes          | **      | 0.0067           |                             |    |                               |
| CCT020312 vs. STF-083010              | 0.2080 to 0.6002    | Yes          | ****    | < 0.0001         |                             |    |                               |
| CCT020312 vs. Control CRISPR          | 0.2002 to 0.5924    | Yes          | ****    | < 0.0001         |                             |    |                               |
| CCT020312 vs. PERK CRISPR             | 0.4185 to 0.8107    | Yes          | ****    | < 0.0001         |                             |    |                               |
| STF-083010 vs. Control CRISPR         | -0.2039 to 0.1883   | No           | ns      | > 0.9999         |                             |    |                               |
| STF-083010 vs. PERK CRISPR            | 0.01442 to 0.4067   | Yes          | *       | 0.0262           |                             |    |                               |
| Control CRISPR vs. PERK CRISPR        | 0.02221 to 0.4145   | Yes          | *       | 0.0182           |                             |    |                               |

pPERK Western Blot

| Statistical Data Analysis for Fig. 8E |                                   |                     |              |         |                  |                             |    |                    |            |
|---------------------------------------|-----------------------------------|---------------------|--------------|---------|------------------|-----------------------------|----|--------------------|------------|
| CC3 Western Blot                      | Tukey's multiple comparisons test | 95% CI of diff.     | Significant? | Summary | Adjusted P Value | ANOVA table                 | DF | F (DFn, DFd)       | P value    |
|                                       |                                   |                     |              |         |                  | Treatment (between columns) | 10 | F (10, 44) = 22.61 | P < 0.0001 |
|                                       | Control vs. Vehicle               | -1.323 to -0.6641   | Yes          | ****    | < 0.0001         | Residual (within columns)   | 44 |                    |            |
|                                       | Control vs. Ad-TMBIM6             | -0.6322 to 0.02655  | No           | ns      | 0.0965           | Total                       | 54 |                    |            |
|                                       | Control vs. Scramble siRNA        | -0.5948 to 0.06396  | No           | ns      | 0.2182           |                             |    |                    |            |
|                                       | Control vs. BI-1 siRNA            | -1.142 to -0.4837   | Yes          | ****    | < 0.0001         |                             |    |                    |            |
|                                       | Control vs. DMSO                  | -0.6936 to -0.03477 | Yes          | *       | 0.0195           |                             |    |                    |            |
|                                       | Control vs. APY-29                | -1.131 to -0.4723   | Yes          | ****    | < 0.0001         |                             |    |                    |            |
|                                       | Control vs. CCT020312             | -0.7080 to -0.04921 | Yes          | *       | 0.0129           |                             |    |                    |            |
|                                       | Control vs. STF-083010            | -0.3456 to 0.3132   | No           | ns      | > 0.9999         |                             |    |                    |            |
|                                       | Control vs. Control CRISPR        | -0.5849 to 0.07388  | No           | ns      | 0.2641           |                             |    |                    |            |
|                                       | Control vs. PERK CRISPR           | -0.5739 to 0.08486  | No           | ns      | 0.3219           |                             |    |                    |            |
|                                       | Vehicle vs. Ad-TMBIM6             | 0.3612 to 1.020     | Yes          | ****    | < 0.0001         |                             |    |                    |            |
|                                       | Vehicle vs. Scramble siRNA        | 0.3986 to 1.057     | Yes          | ****    | < 0.0001         |                             |    |                    |            |
|                                       | Vehicle vs. BI-1 siRNA            | -0.1490 to 0.5098   | No           | ns      | 0.7394           |                             |    |                    |            |
|                                       | Vehicle vs. DMSO                  | 0.2999 to 0.9587    | Yes          | ****    | < 0.0001         |                             |    |                    |            |
|                                       | Vehicle vs. APY-29                | -0.1376 to 0.5212   | No           | ns      | 0.6656           |                             |    |                    |            |
|                                       | Vehicle vs. CCT020312             | 0.2855 to 0.9443    | Yes          | ****    | < 0.0001         |                             |    |                    |            |
|                                       | Vehicle vs. STF-083010            | 0.6479 to 1.307     | Yes          | ****    | < 0.0001         |                             |    |                    |            |
|                                       | Vehicle vs. Control CRISPR        | 0.4086 to 1.067     | Yes          | ****    | < 0.0001         |                             |    |                    |            |
|                                       | Vehicle vs. PERK CRISPR           | 0.4195 to 1.078     | Yes          | ****    | < 0.0001         |                             |    |                    |            |
|                                       | Ad-TMBIM6 vs. Scramble siRNA      | -0.2920 to 0.3668   | No           | ns      | > 0.9999         |                             |    |                    |            |
|                                       | Ad-TMBIM6 vs. BI-1 siRNA          | -0.8396 to -0.1808  | Yes          | ***     | 0.0002           |                             |    |                    |            |
|                                       | Ad-TMBIM6 vs. DMSO                | -0.3907 to 0.2681   | No           | ns      | 0.9999           |                             |    |                    |            |
|                                       | Ad-TMBIM6 vs. APY-29              | -0.8282 to -0.1694  | Yes          | ***     | 0.0003           |                             |    |                    |            |
|                                       | Ad-TMBIM6 vs. CCT020312           | -0.4052 to 0.2536   | No           | ns      | 0.9993           |                             |    |                    |            |
|                                       | Ad-TMBIM6 vs. STF-083010          | -0.04277 to 0.6160  | No           | ns      | 0.1399           |                             |    |                    |            |
|                                       | Ad-TMBIM6 vs. Control CRISPR      | -0.2821 to 0.3767   | No           | ns      | > 0.9999         |                             |    |                    |            |
|                                       | Ad-TMBIM6 vs. PERK CRISPR         | -0.2711 to 0.3877   | No           | ns      | > 0.9999         |                             |    |                    |            |
|                                       | Scramble siRNA vs. BI-1 siRNA     | -0.8770 to -0.2182  | Yes          | ****    | < 0.0001         |                             |    |                    |            |
|                                       | Scramble siRNA vs. DMSO           | -0.4281 to 0.2307   | No           | ns      | 0.9939           |                             |    |                    |            |
|                                       | Scramble siRNA vs. APY-29         | -0.8656 to -0.2068  | Yes          | ****    | < 0.0001         |                             |    |                    |            |
|                                       | Scramble siRNA vs. CCT020312      | -0.4426 to 0.2162   | No           | ns      | 0.9831           |                             |    |                    |            |
|                                       | Scramble siRNA vs. STF-083010     | -0.08017 to 0.5786  | No           | ns      | 0.2964           |                             |    |                    |            |
|                                       | Scramble siRNA vs. Control CRISPR | -0.3195 to 0.3393   | No           | ns      | > 0.9999         |                             |    |                    |            |
|                                       | Scramble siRNA vs. PERK CRISPR    | -0.3085 to 0.3503   | No           | ns      | > 0.9999         |                             |    |                    |            |
|                                       | BI-1 siRNA vs. DMSO               | 0.1195 to 0.7783    | Yes          | **      | 0.0015           |                             |    |                    |            |
|                                       | BI-1 siRNA vs. APY-29             | -0.3180 to 0.3408   | No           | ns      | > 0.9999         |                             |    |                    |            |
|                                       | BI-1 siRNA vs. CCT020312          | 0.1051 to 0.7639    | Yes          | **      | 0.0024           |                             |    |                    |            |
|                                       | BI-1 siRNA vs. STF-083010         | 0.4674 to 1.126     | Yes          | ****    | < 0.0001         |                             |    |                    |            |
|                                       | BI-1 siRNA vs. Control CRISPR     | 0.2281 to 0.8869    | Yes          | ****    | < 0.0001         |                             |    |                    |            |
|                                       | BI-1 siRNA vs. PERK CRISPR        | 0.2391 to 0.8979    | Yes          | ****    | < 0.0001         |                             |    |                    |            |
|                                       | DMSO vs. APY-29                   | -0.7669 to -0.1081  | Yes          | **      | 0.0021           |                             |    |                    |            |
|                                       | DMSO vs. CCT020312                | -0.3438 to 0.3150   | No           | ns      | > 0.9999         |                             |    |                    |            |
|                                       | DMSO vs. STF-083010               | 0.01856 to 0.6774   | Yes          | *       | 0.0306           |                             |    |                    |            |
|                                       | DMSO vs. Control CRISPR           | -0.2207 to 0.4380   | No           | ns      | 0.9874           |                             |    |                    |            |
|                                       | DMSO vs. PERK CRISPR              | -0.2098 to 0.4490   | No           | ns      | 0.9749           |                             |    |                    |            |
|                                       | APY-29 vs. CCT020312              | 0.09366 to 0.7525   | Yes          | **      | 0.0034           |                             |    |                    |            |
|                                       | APY-29 vs. STF-083010             | 0.4560 to 1.115     | Yes          | ****    | < 0.0001         |                             |    |                    |            |
|                                       | APY-29 vs. Control CRISPR         | 0.2167 to 0.8755    | Yes          | ****    | < 0.0001         |                             |    |                    |            |
|                                       | APY-29 vs. PERK CRISPR            | 0.2277 to 0.8865    | Yes          | ****    | < 0.0001         |                             |    |                    |            |
|                                       | CCT020312 vs. STF-083010          | 0.03299 to 0.6918   | Yes          | *       | 0.0205           |                             |    |                    |            |
|                                       | CCT020312 vs. Control CRISPR      | -0.2063 to 0.4525   | No           | ns      | 0.9695           |                             |    |                    |            |
|                                       | CCT020312 vs. PERK CRISPR         | -0.1953 to 0.4635   | No           | ns      | 0.9467           |                             |    |                    |            |
|                                       | STF-083010 vs. Control CRISPR     | -0.5687 to 0.09009  | No           | ns      | 0.3518           |                             |    |                    |            |
|                                       | STF-083010 vs. PERK CRISPR        | -0.5577 to 0.1011   | No           | ns      | 0.4192           |                             |    |                    |            |
|                                       | Control CRISPR vs. PERK CRISPR    | -0.3184 to 0.3404   | No           | ns      | > 0.9999         |                             |    |                    |            |

A summary excel spreadsheet showing detailed statistical analysis tests with exact p values, degrees of freedom and F values for western blot data showing the expression levels of IRE1α and PERK receptor changes as well as pro-apoptotic markers after OGD. Data expressed as mean +/- SD; Test used was one-way ANOVA followed by Tukey multiple-comparison post hoc analysis (n=6)

**Table S9 Statistical Analysis for Percent Infarcted Area**

| <b>Statistical Analysis for Fig. 3B</b>               |                      |          |          |                  |          |
|-------------------------------------------------------|----------------------|----------|----------|------------------|----------|
| <b>One Way Repeated Measures Analysis of Variance</b> |                      |          |          |                  |          |
| <b>Normality test: Shapiro-Wilk - passed (p=0.54)</b> |                      |          |          |                  |          |
| <b>Comparison</b>                                     | <b>Diff of Means</b> | <b>t</b> | <b>P</b> | <b>P&lt;0.05</b> | <b>F</b> |
| 1h V vs. -48h T                                       | 12.569               | 4.726    | 0.002    | Yes              | 6.863    |
| 1h V vs. -72h T                                       | 13.763               | 4.589    | 0.002    | Yes              |          |
| 1h T vs. -48h T                                       | 10.088               | 4.038    | 0.01     | Yes              |          |
| -24h V vs. -48h T                                     | 10.719               | 4.031    | 0.01     | Yes              |          |
| -24h V vs. -72h T                                     | 11.913               | 3.972    | 0.011    | Yes              |          |
| 1h T vs. -72h T                                       | 11.282               | 3.948    | 0.011    | Yes              |          |
| -48h V vs. -48h T                                     | 9.609                | 3.613    | 0.025    | Yes              |          |
| -48h V vs. -72h T                                     | 10.803               | 3.602    | 0.025    | Yes              |          |
| 1h V vs. -24h T                                       | 7.579                | 2.85     | 0.15     | No               |          |
| 1h V vs. -72h V                                       | 8.123                | 2.708    | 0.196    | No               |          |
| -24h T vs. -72h T                                     | 6.183                | 2.164    | 0.513    | No               |          |
| -24h V vs. -24h T                                     | 5.729                | 2.154    | 0.5      | No               |          |
| -24h V vs. -72h V                                     | 6.273                | 2.091    | 0.527    | No               |          |
| 1h T vs. -24h T                                       | 5.098                | 2.041    | 0.542    | No               |          |
| -24h T vs. -48h T                                     | 4.99                 | 1.998    | 0.551    | No               |          |
| 1h T vs. -72h V                                       | 5.642                | 1.974    | 0.542    | No               |          |
| -72h V vs. -72h T                                     | 5.64                 | 1.776    | 0.663    | No               |          |
| -48h V vs. -24h T                                     | 4.619                | 1.737    | 0.66     | No               |          |
| -48h V vs. -72h V                                     | 5.163                | 1.721    | 0.636    | No               |          |
| -72h V vs. -48h T                                     | 4.447                | 1.556    | 0.717    | No               |          |
| 1h V vs. -48h V                                       | 2.96                 | 1.053    | 0.943    | No               |          |
| 1h V vs. 1h T                                         | 2.481                | 0.933    | 0.955    | No               |          |
| 1h V vs. -24h V                                       | 1.85                 | 0.658    | 0.987    | No               |          |
| -48h T vs. -72h T                                     | 1.193                | 0.418    | 0.997    | No               |          |
| -24h V vs. -48h V                                     | 1.11                 | 0.395    | 0.991    | No               |          |
| -24h V vs. 1h T                                       | 0.631                | 0.237    | 0.994    | No               |          |
| -24h T vs. -72h V                                     | 0.543                | 0.19     | 0.978    | No               |          |
| 1h T vs. -48h V                                       | 0.479                | 0.18     | 0.858    | No               |          |

A summary excel spreadsheet showing detailed statistical analysis of one way repeated measures analysis of variance followed by Holm-Sidak post hoc test to show difference of Ad-TMBIM6 treatment between groups and across time points. (-72h/-48h/-24h V represents HI+vehicle group at 72h/48h/24h pre HI; -72h/-48h/-24h T represents HI+Ad-TMBIM6 treatment group at 72h/48h/24h pre HI; 1h V or 1h T represents HI+vehicle or HI+Ad-TMBIM6 treatment group at 1h post HI)



**Table S10 Statistical Analysis for Long Term Behavioral Data**

| Statistical Analysis for Fig. 3B                |               |       |        |        |     |                   |               |       |       |        |
|-------------------------------------------------|---------------|-------|--------|--------|-----|-------------------|---------------|-------|-------|--------|
| One Way Repeated Measures Analysis of Variance  |               |       |        |        |     |                   |               |       |       |        |
| Normality test: Shapiro-Wilk - passed (p=0.175) |               |       |        |        |     |                   |               |       |       |        |
| Comparison                                      | Diff of Means | t     | P      | P<0.05 | F   | Comparison        | Diff of Means | t     | P     | P<0.05 |
| Col 15 vs. Col 13                               | 13677.021     | 2.777 | 0.039  | Yes    | 8.8 | Col 10 vs. Col 11 | 7361.065      | 1.841 | 0.909 | No     |
| Col 14 vs. Col 15                               | 11066.741     | 2.571 | 0.028  | Yes    |     | Col 6 vs. Col 1   | 7512.862      | 1.79  | 0.926 | No     |
| Col 6 vs. Col 13                                | 26377.916     | 6.284 | <0.001 | Yes    |     | Col 6 vs. Col 7   | 7119.008      | 1.781 | 0.923 | No     |
| Col 10 vs. Col 13                               | 25718.026     | 6.127 | <0.001 | Yes    |     | Col 14 vs. Col 11 | 6594.766      | 1.65  | 0.963 | No     |
| Col 14 vs. Col 13                               | 24951.726     | 5.945 | <0.001 | Yes    |     | Col 10 vs. Col 1  | 6852.972      | 1.633 | 0.963 | No     |
| Col 2 vs. Col 13                                | 24524.375     | 5.843 | <0.001 | Yes    |     | Col 10 vs. Col 7  | 6459.118      | 1.616 | 0.963 | No     |
| Col 6 vs. Col 9                                 | 22858.42      | 5.446 | <0.001 | Yes    |     | Col 2 vs. Col 11  | 6167.415      | 1.543 | 0.975 | No     |
| Col 10 vs. Col 9                                | 22198.53      | 5.289 | <0.001 | Yes    |     | Col 14 vs. Col 1  | 6086.673      | 1.45  | 0.986 | No     |
| Col 3 vs. Col 13                                | 23463.008     | 5.241 | <0.001 | Yes    |     | Col 14 vs. Col 7  | 5692.818      | 1.424 | 0.987 | No     |
| Col 6 vs. Col 5                                 | 21723.018     | 5.175 | <0.001 | Yes    |     | Col 2 vs. Col 1   | 5659.322      | 1.348 | 0.992 | No     |
| Col 14 vs. Col 9                                | 21432.231     | 5.106 | <0.001 | Yes    |     | Col 2 vs. Col 7   | 5265.467      | 1.317 | 0.993 | No     |
| Col 10 vs. Col 5                                | 21063.128     | 5.018 | <0.001 | Yes    |     | Col 3 vs. Col 11  | 5106.048      | 1.19  | 0.997 | No     |
| Col 2 vs. Col 9                                 | 21004.88      | 5.004 | <0.001 | Yes    |     | Col 3 vs. Col 1   | 4597.955      | 1.027 | 1     | No     |
| Col 14 vs. Col 5                                | 20296.829     | 4.836 | <0.001 | Yes    |     | Col 7 vs. Col 15  | 4582.221      | 1.025 | 0.999 | No     |
| Col 2 vs. Col 5                                 | 19869.478     | 4.734 | <0.001 | Yes    |     | Col 5 vs. Col 13  | 4654.897      | 1     | 0.999 | No     |
| Col 3 vs. Col 9                                 | 19943.513     | 4.455 | 0.002  | Yes    |     | Col 3 vs. Col 7   | 4204.1        | 0.98  | 0.999 | No     |
| Col 7 vs. Col 13                                | 19258.908     | 4.302 | 0.003  | Yes    |     | Col 1 vs. Col 15  | 4188.367      | 0.901 | 1     | No     |
| Col 3 vs. Col 5                                 | 18808.111     | 4.201 | 0.004  | Yes    |     | Col 11 vs. Col 15 | 3680.274      | 0.823 | 1     | No     |
| Col 11 vs. Col 13                               | 18356.96      | 4.101 | 0.006  | Yes    |     | Col 9 vs. Col 13  | 3519.495      | 0.756 | 1     | No     |
| Col 1 vs. Col 13                                | 18865.053     | 4.052 | 0.007  | Yes    |     | Col 6 vs. Col 3   | 2914.907      | 0.729 | 1     | No     |
| Col 7 vs. Col 9                                 | 15739.412     | 3.516 | 0.037  | Yes    |     | Col 10 vs. Col 3  | 2255.018      | 0.564 | 1     | No     |
| Col 11 vs. Col 9                                | 14837.465     | 3.314 | 0.067  | No     |     | Col 6 vs. Col 2   | 1853.54       | 0.503 | 1     | No     |
| Col 1 vs. Col 9                                 | 15345.558     | 3.296 | 0.07   | No     |     | Col 6 vs. Col 14  | 1426.189      | 0.387 | 1     | No     |
| Col 7 vs. Col 5                                 | 14604.011     | 3.262 | 0.075  | No     |     | Col 14 vs. Col 3  | 1488.718      | 0.372 | 1     | No     |
| Col 11 vs. Col 5                                | 13702.063     | 3.061 | 0.128  | No     |     | Col 10 vs. Col 2  | 1193.65       | 0.324 | 1     | No     |
| Col 1 vs. Col 5                                 | 14210.156     | 3.052 | 0.128  | No     |     | Col 2 vs. Col 3   | 1061.367      | 0.265 | 1     | No     |
| Col 6 vs. Col 15                                | 11701.229     | 2.792 | 0.245  | No     |     | Col 5 vs. Col 9   | 1135.402      | 0.244 | 1     | No     |
| Col 10 vs. Col 15                               | 11041.339     | 2.634 | 0.344  | No     |     | Col 7 vs. Col 11  | 901.947       | 0.21  | 1     | No     |
| Col 15 vs. Col 9                                | 11157.191     | 2.399 | 0.522  | No     |     | Col 10 vs. Col 14 | 766.3         | 0.208 | 1     | No     |
| Col 2 vs. Col 15                                | 9847.689      | 2.349 | 0.557  | No     |     | Col 6 vs. Col 10  | 659.89        | 0.179 | 1     | No     |
| Col 15 vs. Col 5                                | 10021.789     | 2.155 | 0.72   | No     |     | Col 14 vs. Col 2  | 427.351       | 0.116 | 0.999 | No     |
| Col 6 vs. Col 11                                | 8020.955      | 2.006 | 0.827  | No     |     | Col 1 vs. Col 11  | 508.093       | 0.114 | 0.992 | No     |
| Col 3 vs. Col 15                                | 8786.322      | 1.965 | 0.846  | No     |     | Col 7 vs. Col 1   | 393.854       | 0.088 | 0.93  | No     |

A summary excel spreadsheet showing detailed statistical analysis of one way repeated measures analysis of variance followed by Holm-Sidak post hoc test to show difference of Ad-TMBIM6 treatment between groups and across blocks. (Col 1 represents sham group, block 1; Col 2 represents HI+vehicle group, block 1; Col 3 represents HI+Ad-TMBIM6 treatment group, block 1; Col 5 represents sham group, block 2; Col 6 represents HI+vehicle group, block 2; Col 7 represents HI+Ad-TMBIM6 treatment group, block 2; Col 9 represents sham group, block 3; Col 10 represents HI+vehicle group, block 3; Col 11 represents HI+Ad-TMBIM6 treatment group, block 3; Col 13 represents sham group, block 4; Col 14 represents HI+vehicle group, block 4; Col 15 represents HI+Ad-TMBIM6 treatment group, block 4).

Fig. S1 Co-localization of BI-1 with Microglia at 72h post-HI

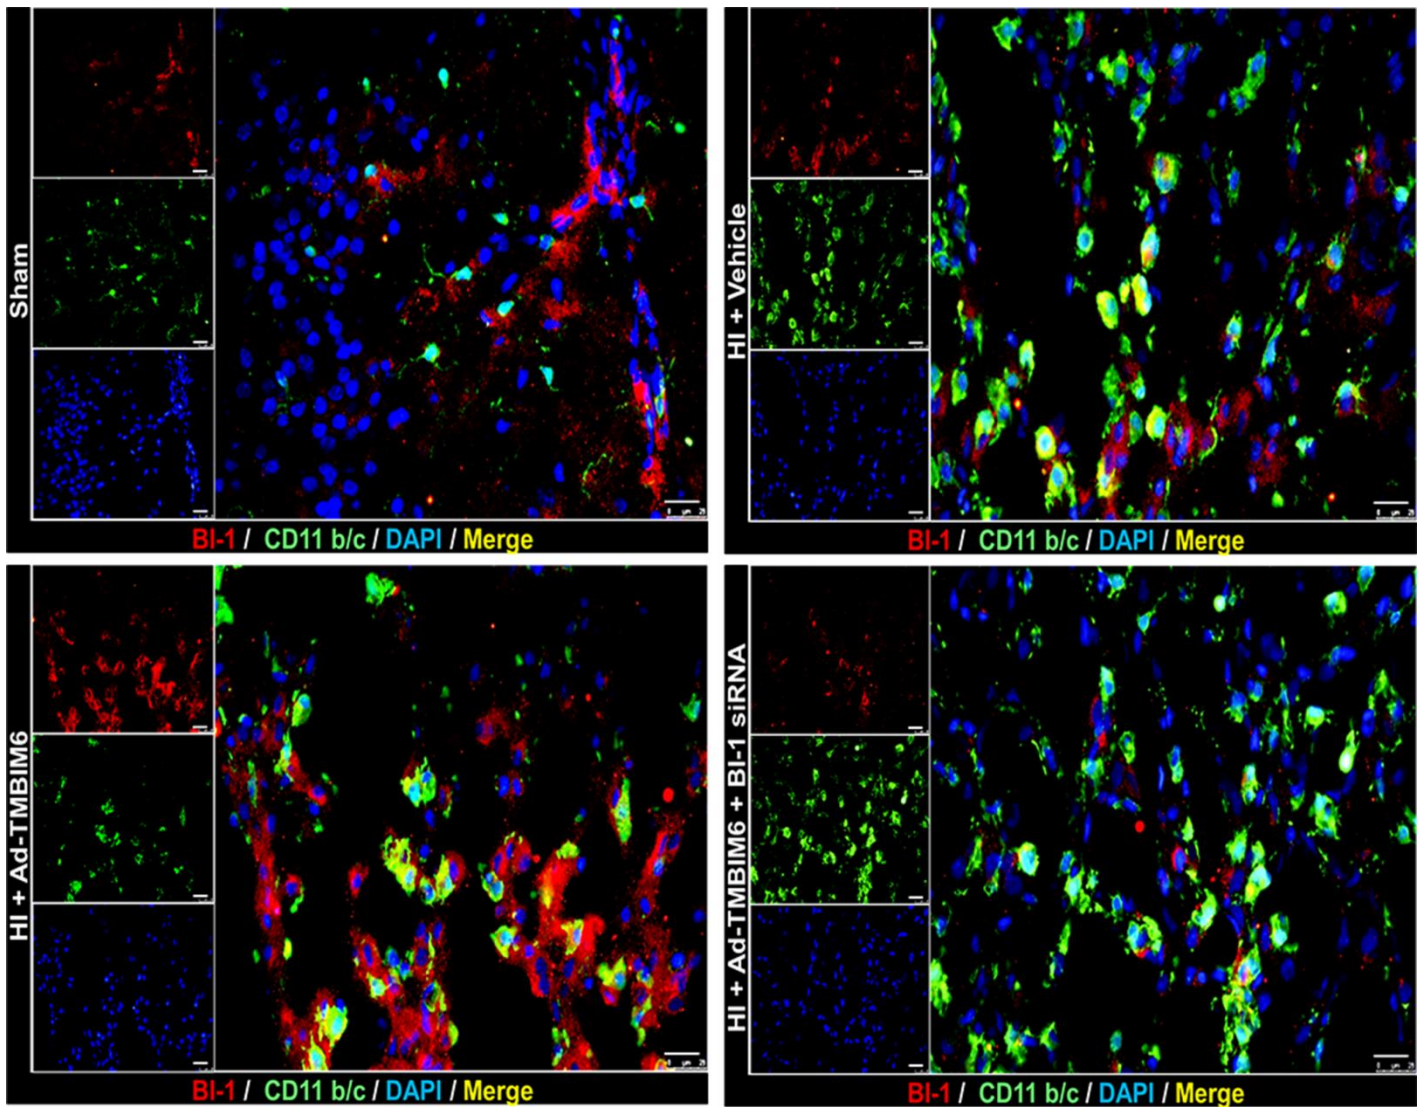

Representative microphotographs of double immunofluorescent staining of BI-1 (red) with microglia (Cd11b/c, green) at 72h post-HI. (Green: microglia; Red: BI-1; Blue: DAPI; Merge shows the co-localization of BI-1 with microglia (yellow); Scale bar = 25 $\mu$ m).

Fig. S2 Expression of pIRE1 $\alpha$  with Microglia at per-infarcted area at 72h post-HI

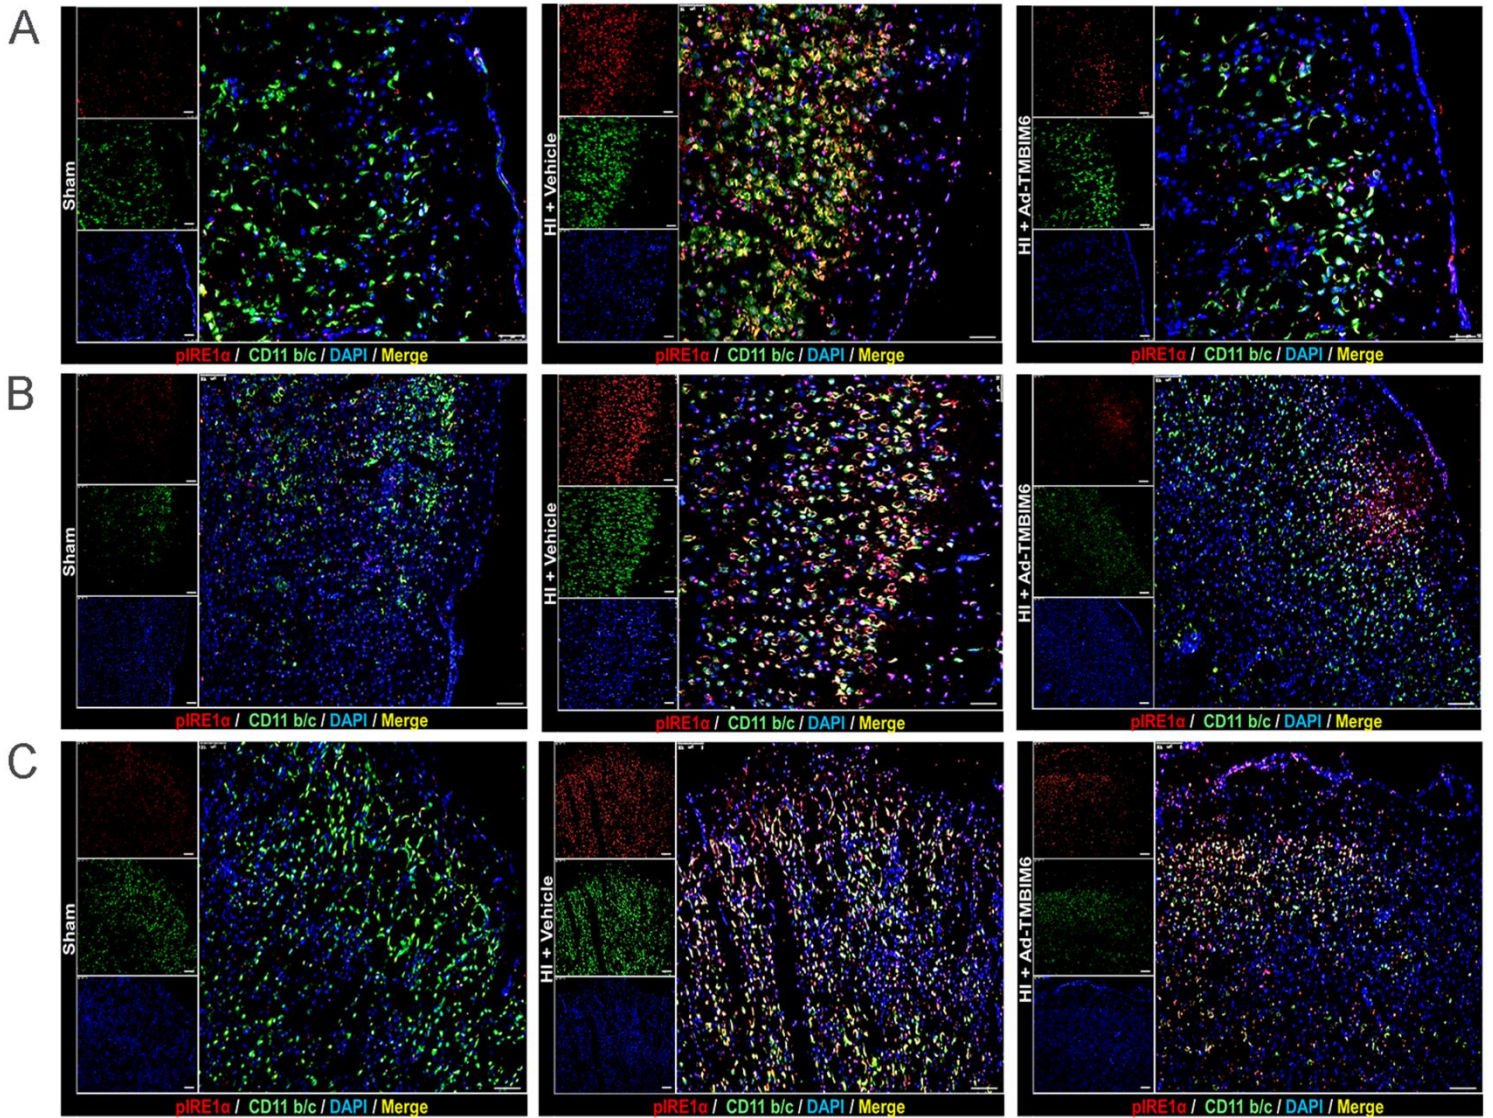

Representative microphotographs of double immunofluorescent staining of pIRE1 $\alpha$  (red) with microglia (Cd11b/c, green) at 72h post-HI. Panels A, B and C are images taken from different tissues to show the extent to which the ER stress marker, IRE1 $\alpha$ , is spread throughout the injury area. Merge shows the co-localization of BI-1 with microglia (CD11b/c). Scale bar = 100 $\mu$ m

**Fig. S3 Representative Western Blot bands of key protein expression densities in primary neuronal cell cultures**

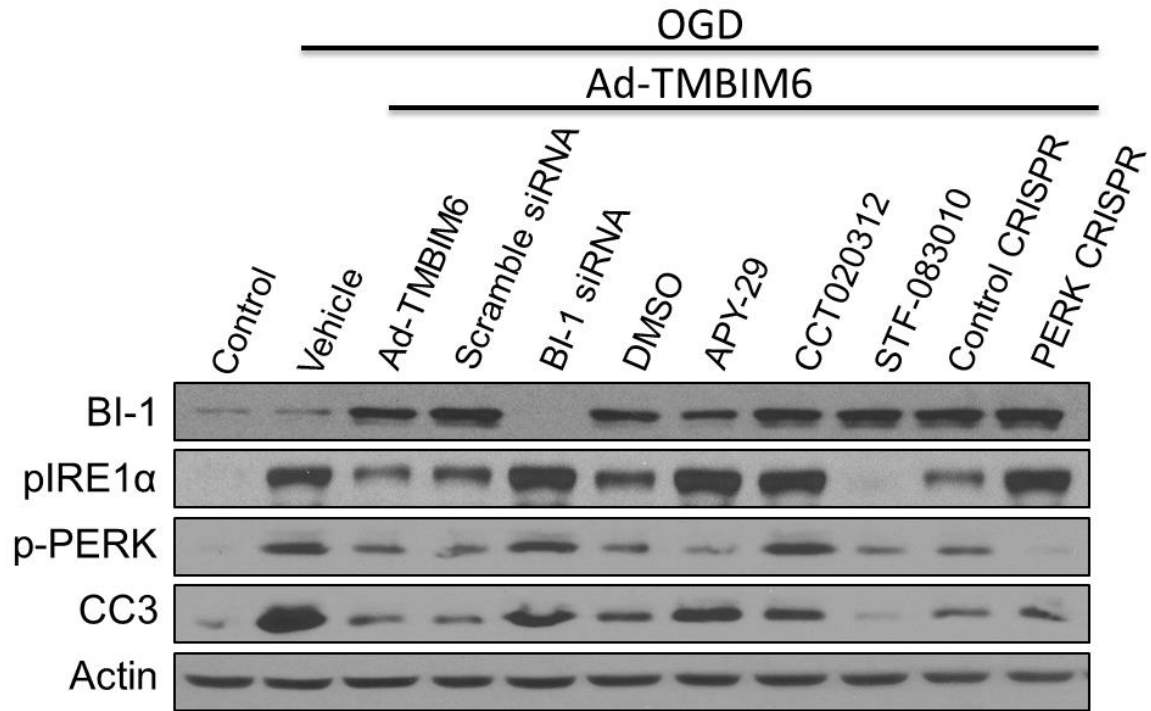

The density of BI-1 protein was higher after Ad-TMBIM6 treatment and in control groups compared to vehicle; while expression densities of pIRE1α, p-PERK and CC3 were reduced after Ad-TMBIM6 treatment in primary neuronal cell cultures.
